# Supplementary material for: Effects of Caricaturing in Shape or Color on Familiarity Decisions for Familiar and Unfamiliar Faces
Source: PLoS One. 2016 Feb 22;11(2):e0149796. doi: 10.1371/journal.pone.0149796 (PMC4762690; doi:10.1371/journal.pone.0149796)
Supplement: S1 Dataset — (XLSX) [file pone.0149796.s001.xlsx]

## Sheet: behavioral
Subjects	F_S_1	F_S_2	F_S_3	F_S_4	F_C_1	F_C_2	F_C_3	F_C_4	F_B_1	F_B_2	F_B_3	F_B_4	UF_S_1	UF_S_2	UF_S_3	UF_S_4	UF_C_1	UF_C_2	UF_C_3	UF_C_4	UF_B_1	UF_B_2	UF_B_3	UF_B_4	RT_F_S_1	RT_F_S_2	RT_F_S_3	RT_F_S_4	RT_F_C_1	RT_F_C_2	RT_F_C_3	RT_F_C_4	RT_F_B_1	RT_F_B_2	RT_F_B_3	RT_F_B_4	RT_UF_S_1	RT_UF_S_2	RT_UF_S_3	RT_UF_S_4	RT_UF_C_1	RT_UF_C_2	RT_UF_C_3	RT_UF_C_4	RT_UF_B_1	RT_UF_B_2	RT_UF_B_3	RT_UF_B_4	d_S_1
1	0.935	0.935	0.968	0.968	1	1	1	1	0.969	0.969	0.938	1	1	1	1	0.969	1	1	1	1	1	1	1	1	585.07	594.59	594.23	618.37	603.39	584.77	587.43	610.52	622.87	585.77	567.53	586.56	623.88	615.16	612.97	589.71	617.47	608.19	589.28	634.19	595.84	609.31	619	628.53	3.58783
2	0.643	0.654	0.607	0.679	0.769	0.846	0.808	0.875	0.75	0.679	0.769	0.92	1	1	1	1	1	1	0.969	1	1	1	1	1	761.28	700.59	761.18	732.05	732.65	744.59	757.62	764.95	794.48	689.42	834.85	759.96	672.91	710.41	687.53	687.03	680.25	737.16	772.94	722.16	745.56	723.75	734.41	701.09	2.43601
3	0.969	1	1	1	0.935	0.871	0.935	0.903	0.969	0.969	0.969	0.969	0.969	1	1	1	0.938	0.969	0.906	0.938	0.938	1	0.969	1	628.19	595.22	599.84	614.63	584.79	595	599	660.68	603.19	619.71	601.45	644.13	553.23	585.72	587.97	559.53	569.1	581.74	597.97	599.83	573.93	585.59	598.42	599.84	3.72546
4	0.875	0.938	0.938	0.938	0.968	1	1	0.968	0.969	0.969	1	1	1	1	1	1	1	0.969	1	1	1	1	0.969	1	549.64	591.27	593.43	638.77	550.63	595.84	553.81	574.1	528.55	579.42	589.1	626.41	503.75	497.19	499.94	513	513.53	511.06	513.44	514.22	529.13	557.19	503.16	523.88	3.22025
5	1	0.968	0.968	0.935	0.968	0.968	0.968	0.968	0.893	0.857	0.929	0.893	1	1	1	0.969	0.969	0.969	1	1	1	1	1	1	620.45	606.9	614.83	637.1	596.1	592.67	587.57	650.53	613.08	631.5	604.69	602.36	577.59	552.28	566.16	537.87	574	585.19	561.88	597.94	581.41	588.06	554.81	593.44	4.2111
7	1	0.966	0.9	0.933	1	1	0.935	1	1	1	1	0.969	1	1	1	1	0.969	1	1	0.969	0.969	1	1	1	606.57	584.54	605.3	650.29	586.13	611.42	601.97	595.81	605.97	611.91	594.75	596.55	578.44	583.56	592.44	565.97	565.81	578.81	597.16	597	594.45	565.19	584.72	607.75	4.19795
8	0.889	0.944	0.889	0.778	0.842	0.9	0.95	0.85	0.955	0.952	0.955	0.909	1	0.935	1	0.969	0.875	0.844	0.867	0.844	0.906	1	0.938	0.813	714.06	703.41	736	690.14	769.38	662.94	721.26	639.76	713.76	725.85	738.62	719.55	666.06	657.93	730.81	675.87	749.5	708.44	771.35	723.63	708.72	690	697.4	710.92	3.29054
9	0.889	0.815	0.852	0.852	0.724	0.786	0.759	0.759	0.742	0.774	0.774	0.677	1	0.969	1	1	0.969	1	1	1	0.969	1	1	1	639.38	571.27	571.04	587.17	595.52	579.5	585.77	595.41	575.43	593.42	542.54	570.9	449.78	485.87	466.38	462	457.87	485	498.19	453.81	488.39	459.69	472.13	471.16	3.29054
10	0.917	0.917	0.87	0.909	0.867	0.862	0.862	0.857	0.931	0.867	0.967	0.967	1	0.969	1	1	0.938	0.938	0.906	0.906	1	1	1	0.969	668.14	663.32	664.95	567.35	738.04	657.92	596.4	600.75	666.56	639.12	647.1	656.41	631.72	568.03	582.78	616.28	610.3	628.63	684.14	661.62	690.38	640.31	616.47	641.29	3.4529
11	0.909	0.955	0.909	0.773	0.952	0.952	0.905	0.905	0.882	0.882	1	1	1	1	1	0.969	1	1	0.969	0.969	1	1	1	0.969	603.45	585.9	568.6	595.76	583.7	583.15	609.74	577.63	583.93	624.8	582.53	590.53	501.13	526	502.41	508.48	537.28	513.63	524.42	530.19	487.88	528.03	522.09	491.03	3.40508
12	0.969	0.969	0.938	0.906	0.867	0.935	1	0.935	0.875	0.969	0.906	0.938	0.969	0.938	1	0.938	1	1	0.935	1	1	1	0.969	0.935	573.87	635.19	636.8	590.14	647.19	680.86	629.74	627.14	589.75	613.71	599.21	622	601.74	658.3	620.94	619.83	621.69	675.22	627.41	629.16	651.5	622.19	621.35	612.41	3.72546
13	0.885	0.923	0.962	1	1	0.926	0.926	1	0.897	0.828	0.931	0.931	0.969	0.969	0.969	0.938	1	0.969	1	1	0.969	0.969	0.969	1	704.09	704.83	723.52	645.73	719.19	657.88	685.36	630.81	643.23	661.5	670.96	672.85	558.45	585	595.58	580.47	563.39	601.1	589.63	598.44	582.97	542.9	587.87	596.06	3.06111
14	1	1	0.967	0.933	0.968	0.938	0.938	0.968	0.867	0.933	0.9	0.9	1	1	1	0.968	1	1	1	1	1	1	1	0.969	875.57	824.79	776.48	802.75	760.93	748.47	779.93	783.5	826.65	760.04	771	790.52	778.78	731.23	795.61	719	824.87	768.47	778.34	872.73	788.44	765.09	766.59	754	4.19795
15	0.733	0.9	0.8	0.821	0.862	0.778	0.821	0.786	0.75	0.741	0.846	0.857	0.935	0.903	0.903	0.969	0.966	0.903	0.938	0.935	1	0.935	0.968	0.935	835.09	848.56	820.75	780.57	875.44	801.38	834.13	855.59	884.86	797.9	768.64	830.17	860.38	797.5	871.93	859.52	899.25	830.25	836.2	879.21	871.58	918.72	945.13	937.1	2.14085
16	0.969	0.906	1	0.969	0.969	1	0.935	1	1	1	1	0.906	0.938	0.938	1	0.969	1	1	0.938	0.969	1	1	0.969	1	567.16	567.41	604.88	608.65	566.52	554.16	570.83	571.13	578.94	523.53	579.59	576.72	584.83	553.7	553.26	529.45	548.56	579.16	552.67	589.58	534.16	567.84	599	541.22	3.39685
17	0.926	0.76	0.611	0.741	0.897	0.893	0.92	0.964	0.808	0.852	0.833	0.885	1	0.792	0.931	0.967	0.96	0.897	0.867	0.926	0.926	0.962	1	0.917	587.84	529.84	524.82	537.75	601.46	553.36	577.43	574.52	583.52	590.7	504.48	525.09	553.37	478.53	507.11	517	544.75	519.77	506.77	609.28	508.04	484.56	507.96	485.32	3.51601
19	0.969	1	0.969	0.969	1	1	0.969	1	1	1	0.968	0.968	0.969	0.969	0.969	1	0.969	1	1	0.969	1	1	1	1	517.03	532.28	528.97	545.06	500.59	496.5	491.61	503.06	508.68	535	503.43	509.43	561.97	582.32	588.45	586.13	558.35	577.56	586.81	595.84	553.41	601.47	562.47	586	3.72546
20	0.964	0.897	0.821	0.857	0.926	0.815	0.923	0.926	0.806	0.935	0.806	0.871	0.969	0.935	1	1	0.938	0.935	0.969	1	0.938	0.969	0.969	0.938	737.15	796.46	740.65	837.71	768.16	837.82	725.21	710.36	787.24	765.9	759.16	741.85	726.52	707.59	684.38	677.97	701.77	671.59	671.03	714.56	700.67	673.13	710.77	777.33	3.66547
21	0.952	0.905	0.857	0.95	0.905	1	0.905	0.952	0.8	0.875	0.938	0.875	0.969	0.968	0.969	0.969	0.938	1	0.969	1	0.969	0.935	0.906	1	696.85	735.53	757.11	624.47	694.53	633.67	679.53	700	644.75	715.64	623.47	651.57	637.71	627.33	594.45	643	647.83	560.16	589.35	638.32	649.48	611.55	604.31	612.81	3.53112
22	1	0.969	0.969	1	0.968	0.967	0.968	0.968	0.938	0.969	0.969	0.906	1	1	0.938	0.969	0.969	0.938	1	0.969	1	0.969	0.969	0.969	515.53	520.23	548.19	544.91	582.87	557.55	544.9	545.2	566.53	566.45	583.97	543.41	593	610.97	618.5	592.06	598.77	565.27	602.59	598.39	608.44	564.52	569.29	589.97	4.12365
23	0.793	0.828	0.759	0.828	0.833	0.967	0.893	0.867	0.969	0.969	0.906	0.906	0.938	0.906	0.903	0.906	0.906	0.839	0.906	0.844	0.871	0.906	0.906	0.969	742.35	658.79	663.86	752.13	674.44	723.48	687	729.65	693.84	660.77	718.38	706.76	788.83	727.45	724.64	757.83	723.55	754.62	761.31	798.44	776.44	746.93	751.66	745.9	2.35136
24	1	1	0.962	1	1	0.964	0.857	0.929	0.952	1	1	1	1	0.969	1	1	1	1	1	0.968	1	1	1	1	656.35	677.5	756.52	652.92	662.32	691.67	636.67	665.96	704.05	697.57	683.81	692.76	680.78	669.71	639.88	649.31	645.06	655.19	651.88	710	674.38	662.25	684.31	718.31	4.1398
25	0.923	0.962	0.846	0.962	0.966	0.931	1	0.966	0.926	0.926	0.852	0.962	0.938	0.938	1	1	1	1	0.906	0.906	1	0.969	0.968	0.938	623.63	616.6	704.45	666.16	671.64	636.11	630.1	641.14	678.2	616.96	653.78	631.4	620.03	576.83	574.88	657.06	657.88	638.88	689.28	652.24	656.06	628.74	612.93	638.57	2.9602
26	0.846	0.846	0.8	0.769	0.759	0.759	0.786	0.655	0.767	0.8	0.667	0.767	1	1	1	1	1	0.969	1	1	1	1	1	1	715.77	799.27	740.15	739.2	737.91	827.95	764	764.58	717.61	741.67	795.85	770.87	584.66	663.16	603.66	631.84	613.31	605.39	649.25	646	672.72	592.19	674.78	671.16	3.08998
27	0.846	0.885	0.885	0.885	0.667	0.815	0.72	0.741	0.774	0.806	0.871	0.833	1	1	0.969	1	1	1	1	1	1	1	1	1	908.27	806.78	778.39	829.04	828.5	839.05	816.67	883.5	875.63	951.12	867.59	911.12	910.61	849.88	986.87	977.52	922.5	953.78	993.69	955.53	962.13	903.44	990.72	956.78	3.08998
28	0.96	0.88	0.92	0.92	1	0.875	0.958	1	0.931	0.897	0.931	0.931	1	1	1	1	1	1	0.906	1	1	1	1	1	511.38	496.23	543.43	567.96	546	500.43	510.13	510	538.3	513.35	509.52	528.11	465.88	464.75	482.34	477.63	491.69	480.81	493.9	509.72	503.16	482.38	504.38	486.69	3.82059
29	1	1	1	1	1	0.938	1	1	0.966	0.931	0.964	0.966	1	1	1	1	1	1	1	1	0.938	1	1	1	651.97	642.81	640.39	667.06	660.16	603.17	638.28	673.41	670.36	685.48	712.07	661.57	643.16	693.63	665.34	686.91	652.91	677.81	712.56	730.22	647	725.68	658.28	658.72	4.1398
30	0.708	0.792	0.875	0.75	0.741	0.692	0.815	0.72	0.6	0.76	0.76	0.8	1	1	1	1	1	0.969	0.969	1	0.969	0.938	1	1	759.41	719.21	845.76	685.83	762.45	684.67	757.59	784.61	773.13	749.74	823.16	859.85	648.78	654.69	641.41	583.06	637.74	606.26	614.23	689.5	568.26	598.1	601.38	662.44	2.61842
31	0.967	0.933	0.933	0.967	1	1	1	0.967	1	0.966	1	0.964	0.938	0.938	0.969	1	0.938	1	1	0.969	1	1	1	1	548.14	565.61	587.75	562	551.63	540.7	563.13	545.48	558.03	531.96	549.21	534.19	602.03	625.73	636.97	586.26	612.3	639.31	602.31	634.13	626.75	602.97	664.5	619.38	3.36804
32	1	1	1	0.967	1	0.968	1	1	0.933	0.967	1	0.9	0.969	0.969	0.969	1	1	1	1	1	1	1	1	1	646.27	649.17	647.97	613.07	624.68	645.17	615.65	612.06	669.64	678.76	687	691.41	577.26	612.9	546.84	630.19	567.84	583.88	614.06	604.44	574.97	563.84	570.44	583.69	3.93263
33	0.935	0.903	0.935	0.968	0.857	0.929	0.929	0.964	0.889	0.926	0.889	0.926	0.813	0.875	1	1	0.906	0.969	0.969	0.969	0.938	1	0.969	1	579.97	567.46	568.86	590.77	546.42	576.69	596.38	643.37	621.25	585.08	643.29	611.24	592.12	587.36	621.5	596.22	611.38	629.42	569.13	618.9	609.47	609.81	595.84	614.53	2.40508
[truncated: 23 more columns]

## Sheet: P100
Subject	FP1.1	FP1.2	FP1.3	FP1.4	FP1.5	FP1.6	FP1.7	FP1.8	FP1.9	FP1.10	FP1.11	FP1.12	FP1.13	FP1.14	FP1.15	FP1.16	FP1.17	FP1.18	FP1.19	FP1.20	FP1.21	FP1.22	FP1.23	FP1.24	FP2.1	FP2.2	FP2.3	FP2.4	FP2.5	FP2.6	FP2.7	FP2.8	FP2.9	FP2.10	FP2.11	FP2.12	FP2.13	FP2.14	FP2.15	FP2.16	FP2.17	FP2.18	FP2.19	FP2.20	FP2.21	FP2.22	FP2.23	FP2.24	F3.1
1	0.07	-0.133	0.819	0.263	-1.323	-0.052	-0.078	-0.302	-0.565	-0.142	-0.762	-0.529	-0.598	-1.448	-0.188	-1.296	-0.862	-1.446	-0.083	-0.332	0.149	-0.863	-1.226	-0.131	-1.915	-1.356	0.364	-1.511	-1.916	-1.51	-1.026	-1.675	-1.326	-1.731	-2.231	-1.578	-1.326	-2.863	-0.561	-2.413	-1.73	-3.059	-1.929	-2.38	-0.855	-1.583	-1.816	-0.721	-6.174
2	-0.578	-0.576	-1.112	-0.721	-0.958	-0.704	-1.638	-0.722	-2.214	-2.18	-1.268	-0.47	-0.979	-0.644	-1.117	-1.095	-0.999	-1.242	-2.666	-0.823	-1.719	-1.279	-0.749	-1.105	-0.642	-1.804	-0.265	-1.725	-1.127	0.002	-1.15	-0.102	-1.142	-0.618	-0.77	-1.082	-1.523	-0.864	-0.589	-0.768	-0.7	-0.356	-1.538	-0.872	-2.531	-0.612	-1.71	-0.557	-1.562
3	-1.282	-2.266	-2.221	-2.439	0.512	-1.094	0.362	-0.983	-0.176	-0.324	-0.902	-2.305	-1.115	0.267	-0.684	-0.554	-0.315	-0.164	-0.506	-1.033	-1.346	-0.244	-0.812	-1.562	-1.539	-2.101	-2.207	-2.396	0.4	-1.555	-1.196	-0.826	-0.507	-0.23	-0.632	-2.261	-0.132	-0.316	-0.144	0.06	-0.367	-0.397	-0.106	-1.429	-0.639	-0.044	-0.332	-0.578	-3.958
4	1.66	1.368	-0.993	0.864	0.202	0.82	-0.575	-0.006	1.565	1.001	2.186	0.614	0.508	0.626	-0.394	-0.26	0.24	1.546	0.431	0.609	0.756	0.241	1.067	1.256	0.799	0.269	-0.985	0.129	0.033	0.064	-0.137	0.003	1.37	0.297	0.94	0.216	-0.317	0.294	-0.306	-0.538	0.558	1.302	0.707	0.966	0.54	0.398	0.74	-0.707	-3.14
5	-1.093	-0.94	-0.263	-0.745	-2.256	-1.102	-1.32	-1.259	-1.71	-0.991	-0.314	-0.774	-0.189	-0.956	-1.476	-0.851	-1.536	-1.318	0.349	-0.897	-0.074	-0.95	-1.734	-0.095	-1.354	-0.885	0.219	-0.583	-1.821	-1.389	-0.884	-0.941	-1.292	-1.277	-0.439	-0.733	0.385	-1.197	-0.705	-0.233	-0.664	-1.123	0.928	-0.745	-0.796	-1.31	-1.061	-0.666	-2.658
7	-0.201	2.537	-0.205	-0.159	1.298	0.539	1.051	2.839	0.826	0.651	0.055	1.531	0.503	1.082	0.349	2.335	0.908	0.506	1.247	1.06	0.201	-0.018	1.392	1.301	-0.322	1.685	-0.071	0.187	-0.07	0.236	0.343	1.811	0.625	0.355	-0.449	1.179	0.347	0.121	-0.239	1.398	0.781	-0.05	0.166	0.506	0.238	-0.954	0.89	0.871	-3.582
8	0.417	-0.22	0.243	-0.378	-1.25	0.607	-1.457	-0.901	-0.556	-1.208	-1.083	-0.916	-0.83	-0.82	0.48	-0.47	-0.687	0.144	-0.981	0.367	-0.301	-0.661	-0.047	-1.236	-0.772	-1.204	-0.176	-0.984	-1.83	0.06	-1.293	-0.448	-1.335	-0.911	-0.794	-0.011	-0.904	-1.385	-0.352	-0.748	-0.688	-0.658	-1.578	-0.602	-0.489	-1.009	-1.579	-1.375	0.513
9	2	1.888	1.994	-1.931	2.361	2.078	1.785	1.603	0.824	3.72	1.232	0.322	4.363	2.309	2.409	1.681	1.219	2.792	3.57	1.399	2.05	0.961	2.427	1.609	1.778	0.566	1.076	-0.81	0.917	0.299	1.095	1.016	1.134	2.231	0.656	-0.687	2.684	1.812	1.571	0.54	0.698	1.939	1.828	0.806	0.585	0.526	1.436	-0.258	-4.058
10	0.163	-0.536	0.478	2.006	-0.915	1.069	0.491	0.65	1.135	0.05	0.903	0.123	0.36	0.62	0.759	0.608	0.72	0.547	0.2	0.576	0.353	-0.198	1.369	-0.005	0.927	-0.065	1.963	3.086	0.417	0.117	0.669	1.389	0.852	0.433	0.861	-0.006	1.294	0.452	0.604	0.779	1.184	0.846	0.291	1.02	0.67	1.045	1.213	1.142	-2.058
11	0.293	0.248	0.349	0.279	-0.124	0.003	-0.269	1.238	1.421	0.533	0.174	-0.333	0.153	0.19	-0.412	-0.11	0.311	0.314	0.026	0.598	1.293	0.263	0.141	0.412	0.209	0.041	0.18	-0.154	-0.142	-0.187	-0.342	1.076	1.015	-0.148	0.293	-0.294	-0.075	-0.17	-0.667	-0.866	0.139	0.332	-0.069	0.103	1.033	-0.01	0.17	0.295	0.286
12	-1.957	-1.605	-1.292	-1.852	-2.748	-1.339	-1.674	-1.878	-2.47	-1.211	-2.107	-2.192	-1.515	-2.049	-2.832	-1.452	-1.667	-2.165	-1.637	-1.874	-2.816	-0.895	-1.311	-2.6	-1.294	-1.254	-0.684	-1.365	-0.877	-0.135	-1.511	-1.684	-1.759	-0.585	-1.053	-1.539	-1.888	-1.134	-1.587	-1.48	-1.347	-1.177	-0.702	-1.13	-0.572	-0.789	-0.207	-1.168	-2.035
13	-0.176	0.263	0.134	0.532	0.206	0.5	1.546	-0.027	0.196	-0.072	0.795	0.085	1.531	0.361	0.487	0.782	1.061	0.545	-0.172	1.299	0.499	0.796	0.03	0.033	-1.111	0.038	-0.986	-0.925	-0.383	-1.003	-0.177	-1.183	-1.199	-1.53	0.379	-1.023	0.416	-0.737	-1.199	-0.103	-0.284	-0.324	-0.234	-0.772	0.319	0.398	-1.203	-0.914	0.193
14	-0.31	-0.159	-0.861	-0.128	-0.228	-1.577	-0.513	-0.78	-0.775	0.755	-0.634	0.417	0.07	-2.817	-1.741	-1.056	-1.553	-0.893	-0.395	-0.66	-1.464	-1.826	-0.371	-0.211	-0.687	-0.26	-2.093	-1.432	-0.823	-1.681	-2.394	-1.099	-0.552	0.063	-1.641	-0.719	-1.335	-2.881	-2.022	-1.248	-2.261	-2.355	-0.659	-0.661	-2.07	-2.072	-1.811	-0.306	-2.962
15	-1.891	-0.513	-0.693	0.085	-0.973	-1.218	-0.493	0.427	-1.496	0.389	-1.57	-0.294	-0.704	0.859	-1.124	-0.596	-0.322	-0.246	-0.523	-0.198	0.828	-0.799	-0.27	1.051	-0.998	-1.041	-1.358	-0.995	-1.947	-1.954	-1.177	0.203	-2.566	-0.275	-0.327	-1.48	-0.151	0.232	-2.082	-1.434	-0.878	-1.634	-0.414	-0.516	0.05	-1.023	-1.524	1.101	-5.343
16	1.135	0.034	0.598	0.757	0.81	0.541	1.504	-1.437	0.199	0.915	1.393	0.883	1.579	0.982	0.189	0.447	0.759	0.762	1.338	0.832	1.165	-0.441	0.761	0.143	1.488	1.204	0.676	1.259	2.533	1.967	1.546	-0.319	1.411	1.928	1.726	1.738	1.155	0.961	1.06	0.098	1.894	1.704	1.49	1.037	2.327	0.25	2.128	-0.687	-1.836
17	-0.591	0.939	-0.399	0.797	1.184	0.43	0.089	0.742	0.403	1.093	0.31	0.655	0.386	0.258	0.474	-0.012	-0.871	0.504	-0.117	0.829	-0.666	0.84	0.861	-0.235	-0.192	1.21	1.182	0.327	0.723	1.221	0.93	1.723	0.572	1.003	-0.196	1.244	0.206	0.657	0.403	0.404	-1.106	-0.278	-0.101	1.489	-0.422	-0.519	0.092	0.241	-0.819
19	1.639	1.354	-0.688	1.126	1.276	0.706	1.098	0.331	1.983	1.316	1.58	0.302	-0.454	1.041	0.111	0.714	1.662	1.139	1.995	3.121	1.5	-0.395	0.783	1.872	0.439	0.141	-1.45	0.632	0.237	-0.02	0.282	-0.24	0.784	0.087	-0.504	-0.269	-0.781	0.132	-0.057	-1.046	0.846	0.161	-0.029	1.65	0.105	-0.901	0.559	0.313	-3.458
20	1.703	0.241	0.74	1.407	1.118	1.239	1.381	1.941	1.139	0.703	1.505	1.552	2.408	1.839	1.799	1.049	2.329	1.542	0.857	1.601	1.047	1.66	1.424	1.686	1.417	0.702	0.868	1.205	1.082	0.608	0.755	1.769	-0.018	0.829	0.72	1.127	1.371	1.333	1.056	1.495	1.922	0.963	1.257	1.305	0.862	0.897	0.734	0.703	-1.457
21	-0.906	0.676	0.372	1.169	0.934	1.162	2.909	1.014	1.113	1.607	0.388	1.681	0.238	0.537	0.195	0.398	0.523	1.092	0.632	1.945	0.387	1.227	1.357	0.414	-1.124	1.045	0.576	0.845	-0.393	1.216	1.789	0.808	0.621	0.978	0.437	1.926	0.345	1.088	0.058	0.331	0.508	1.144	0.631	1.367	-0.157	0.903	1.391	0.546	-1.061
22	-0.148	0.37	0.069	0.145	0.186	-0.18	0.152	-0.086	-0.098	0.004	-0.156	0.557	-0.758	-0.837	-0.28	0	0.985	0.136	0.346	0.301	-0.31	0.127	-0.137	0.08	-0.436	-0.058	-0.243	-0.088	-0.863	-0.267	-0.533	-0.163	0.128	-0.68	-0.601	-0.416	-0.856	-1.123	-0.643	-0.335	-0.452	-0.529	-0.725	-0.013	-0.785	0.086	-1.052	-0.985	-1.669
23	0.166	-1.726	-0.948	-1.826	-0.615	1.466	-0.337	-0.812	0.808	1.303	1.01	-0.729	-0.766	-0.61	-0.824	-0.931	-1.962	1.002	-0.413	2.07	0.682	0.074	-1.326	-1.052	0.107	-1.353	-2.179	-0.818	-0.051	0.455	-0.986	-0.397	-0.425	-0.338	0.535	-1.112	-1.855	1.124	-0.994	-1.273	-0.962	0.723	-0.886	-0.499	-0.172	-0.651	-1.212	-1.594	-5.965
24	-0.522	1.114	0.056	1.274	0.715	-0.541	0.898	0.982	0.723	-0.87	1.026	-0.425	-0.283	-0.928	-1.204	0.622	-0.789	-0.709	0.233	-0.834	0.298	0.104	-0.01	-0.135	-0.663	-0.209	0.78	1.147	0.205	-0.684	-0.37	-0.358	0.492	0.087	1.813	0.439	-0.353	0.392	-0.545	-0.361	-0.567	0.547	0.267	-0.254	0.796	-0.009	0.601	0.106	0.179
25	0.823	1.466	-0.381	0.193	0.31	0.35	-0.019	0.474	0.498	0.746	-0.291	-0.71	-0.609	-0.075	0.31	-1.155	1.139	0.367	-0.251	-0.905	0.743	-0.535	-1.053	-1.027	0.676	0.141	-0.748	-1.626	-0.235	-1.179	0.086	0.252	-0.324	0.125	-0.398	-1.237	0.021	0.805	0.631	-1.376	0.592	-0.089	-0.303	0.446	0.062	-0.653	-0.761	-0.947	-2.08
26	0.578	-0.284	0.946	-0.666	0.794	2.067	0.901	0.016	0.751	0.915	2.089	0.891	0.044	0.897	0.093	0.566	-0.861	0.782	1.436	1.717	2.348	-0.922	0.629	-1.298	0.411	0.629	-0.123	-0.505	1.058	2.356	1.263	-0.923	1.306	0.685	1.63	0.624	-0.573	0.888	0.355	0.739	-0.253	1.267	1.585	1.204	2.482	-1.611	0.894	0.118	-0.945
27	-0.235	1.175	0.62	-0.281	0.509	-1.198	-0.74	-0.035	-0.814	-0.824	0.402	-2.073	-0.408	-0.027	-1.917	-0.053	-2.263	0.712	0.376	-0.545	-0.37	1.392	-1.279	-0.898	0.584	2.044	1.627	0.759	1.136	0.348	-1.053	0.47	1.504	-0.659	0.672	-0.721	0.014	-0.092	-1.272	0.728	-1.851	1.338	-0.059	-0.389	0.397	3.278	0.218	0.383	-4.049
28	-0.99	-2.145	-2.098	-2.594	-1.497	-2.723	-2.499	-2.629	-2.92	-1.611	-0.91	-1.404	-1.137	-2.212	-2.663	-1.739	-2.507	-1.527	-2.747	-2.027	-2.352	-2.332	-2.311	-2.1	-1.013	-1.147	-2.15	-2.139	-1.613	-2.011	-2.32	-2.265	-1.577	-0.666	-1.402	-1.638	-1.839	-1.288	-2.052	-1.271	-2.314	-2.443	-2.265	-2.865	-1.558	-0.657	-0.988	-1.488	-4.423
29	-0.814	-0.651	-0.525	-0.668	-0.98	-0.543	0.068	-0.338	-1.139	-0.895	-0.25	-0.576	-0.831	-1.192	-0.838	-0.739	-0.987	-1.53	-0.906	-0.879	-0.419	-1.438	-1.394	-1.559	-0.712	-0.767	-0.813	0.087	-0.307	-0.473	-0.143	-0.011	-0.357	-0.589	-0.386	-0.966	-0.478	0.023	-0.181	0.641	-0.139	-0.284	-0.651	-0.457	-0.325	-1.08	-0.811	-1.062	-1.442
30	-1.706	-4.069	-2.959	-2.617	-4.669	-2.633	-3.997	-1.742	-2.42	-4.073	-2.156	-3.091	-3.145	-2.459	-3.083	-3.694	-3.24	-1.822	-2.796	-2.929	-5.175	-3.137	-1.595	-2.851	-0.748	-3.223	-1.598	-1.289	-2.875	-0.79	-2.422	-0.429	-0.884	-2.152	-2.379	-2.364	-0.968	-1.434	-2.488	-2.382	-0.997	-1.477	-1.305	-1.023	-4.103	-1.548	-0.167	-1.462	-2.678
31	0.227	-0.885	0.475	0.307	-0.06	0.242	-0.388	0.46	-0.051	0.115	0.178	0.508	-0.523	-0.317	-0.298	0.987	0.447	0.878	-0.487	-0.344	0.804	0.609	0.158	-0.339	0.279	-0.269	0.796	-0.144	-0.137	0.712	0.049	0.474	-0.242	0.181	0.084	0.137	-0.402	0.152	-0.427	1.046	0.492	0.139	-0.529	-0.266	0.89	0.849	0.068	-0.189	-2.788
32	-1.576	-0.792	-2.4	0.496	-0.342	-0.307	-0.083	-0.667	-0.774	-2.312	-0.939	0.09	-0.992	-1.715	0.104	-0.942	-1.031	-0.332	-1.565	-0.027	-1.577	-0.576	0.153	0.233	-2.001	-0.986	-1.614	0.036	-0.529	0.256	0.957	-0.107	-0.312	-1.724	-0.282	0.936	-0.674	-0.545	0.039	-1.353	-0.076	0.878	-0.576	-0.081	-0.717	-1.471	0.516	0.13	-2.403
33	0.982	-1.212	-1.674	0.177	-0.373	0.27	-0.761	-0.868	0.127	-0.706	-0.35	-1.238	-0.272	-0.817	-0.29	-0.791	-0.086	-0.771	-0.464	-0.715	0.363	-0.483	-0.268	-0.456	0.27	-0.686	-1.519	-0.208	-0.062	0.173	-1.146	-0.438	-0.785	0.187	0.198	-0.868	-0.641	-0.257	-0.17	-1.114	-0.03	-0.228	-0.691	-0.473	0.432	-0.694	-0.401	0.124	-2.876
[truncated: 671 more columns]

## Sheet: N170
Subject	FP1.1	FP1.2	FP1.3	FP1.4	FP1.5	FP1.6	FP1.7	FP1.8	FP1.9	FP1.10	FP1.11	FP1.12	FP1.13	FP1.14	FP1.15	FP1.16	FP1.17	FP1.18	FP1.19	FP1.20	FP1.21	FP1.22	FP1.23	FP1.24	FP2.1	FP2.2	FP2.3	FP2.4	FP2.5	FP2.6	FP2.7	FP2.8	FP2.9	FP2.10	FP2.11	FP2.12	FP2.13	FP2.14	FP2.15	FP2.16	FP2.17	FP2.18	FP2.19	FP2.20	FP2.21	FP2.22	FP2.23	FP2.24	F3.1
1	-0.552	-1.173	-0.903	-0.825	-1.811	-0.659	-1.344	-1.29	-1.31	-0.509	-1.107	-2.035	-1.672	-1.441	-0.216	-1.714	-0.586	-1.996	-1.569	-1.789	-0.415	-2.48	-0.933	-1.248	-1.583	-1.822	-1.454	-1.664	-1.809	-1.392	-1.619	-1.46	-1.242	-1.606	-1.884	-2.429	-1.579	-2.14	-0.081	-2.227	-1.438	-2.981	-2.612	-2.209	-1.225	-1.766	-1.411	-1.057	-0.184
2	0.1	-0.302	0.053	2.726	0.429	1.21	0.863	1.829	-0.182	-1.324	0.702	2.151	1.617	0.965	2.15	1.183	1.416	1.422	2.062	1.911	0.191	0.113	1.189	0.817	0.595	-0.66	1.163	2.039	0.674	2.431	2.57	3.381	1.212	0.351	0.83	2.074	1.963	1.303	1.993	1.817	2.018	1.373	2.185	2.382	-0.421	0.958	1.556	0.553	3.385
3	-0.939	-1.891	-1.011	-1.407	-1.453	-0.694	-0.129	-0.98	-0.59	-0.501	-1.167	-2.052	-1.672	-1.05	-0.943	-2.277	-1.163	-0.765	-0.182	-1.099	-1.762	-1.17	-0.495	-0.947	-0.855	-1.461	-0.457	-0.212	-1.155	-1.566	-1.682	-1.142	-0.504	-0.451	-0.564	-1.254	-0.441	0.157	0.288	-1.139	-0.847	-1.548	0.251	-1.258	-1.267	-0.951	-0.454	-0.455	-0.999
4	-1.988	-2.558	-2.903	-2.503	-3.653	-3.03	-3.592	-2.271	-2.686	-1.668	-2.387	-3.197	-2.446	-3.227	-3.854	-2.293	-2.333	-3.648	-4.4	-3.606	-2.291	-2.794	-3.454	-2.003	0.185	-0.893	-0.509	-0.265	-1.377	-0.24	-1.121	-0.438	-0.203	-0.171	-0.1	-0.807	-0.668	-0.174	-0.826	-0.694	-0.274	-0.66	-1.267	-0.342	-0.216	-0.691	-1.292	-0.778	1.828
5	-0.064	-1.085	-0.135	-1.355	-2.465	-0.11	-0.961	-0.467	-1.231	-0.962	-1.285	-1.735	-0.083	-0.538	0.352	-0.739	-1.031	-0.627	-0.602	0.027	-1.023	-0.266	-1.592	-1.577	-1.23	-2.056	-0.973	-1.387	-3.189	-1.428	-1.973	-1.715	-1.785	-1.834	-2.019	-2.023	-0.837	-1.635	-0.84	-0.693	-0.817	-0.894	-1.066	-1.558	-2.704	-1.771	-2.343	-2.644	2.991
7	-1.444	-0.325	-2.658	-1.999	-0.877	-0.129	-0.812	-0.498	-1.514	-0.462	-1.562	-0.395	-1.837	-1.195	0.131	-0.359	-0.902	-1.356	0.079	-2.904	-0.882	-1.745	-2.17	-1.531	-0.647	0.73	-1.842	-1	-1.62	0.401	-0.751	-0.271	-0.548	0.232	-0.897	0.522	-1.215	-1.038	-0.037	-0.157	0.074	-0.727	-0.292	-2.027	-0.058	-1.593	-1.761	-0.509	0.795
8	1.113	-1.096	-0.901	-1.617	-1.134	-0.109	-0.872	-1.485	-0.375	-1.62	-2.147	-2.204	-0.173	-1.243	0.182	-0.117	-1.192	-0.567	-0.736	-0.913	0.015	-1.221	0.103	-1.064	0.214	-1.143	-0.263	-1.261	-1.116	0.67	0.731	0.412	-0.556	-0.185	-0.372	-0.706	-0.052	-0.592	-0.015	0.751	0.014	-0.678	0.196	-0.592	0.134	-0.37	-0.737	-0.626	6.296
9	-1.48	-0.487	0.061	-3.041	-0.791	-0.458	-0.694	-2.244	-1.891	-0.902	-1.378	-1.143	-0.78	-1.626	-1.039	-1.232	-1.343	0.279	-0.265	-2.148	-2.044	-0.428	-1.282	-0.57	-0.083	-0.317	0.129	-1.214	-1.61	-0.649	-0.873	-1.382	-0.483	-0.888	-0.623	-1.21	-0.997	-0.249	-0.859	-0.214	-0.953	0.736	-0.627	-1.845	-1.899	-0.405	-1.317	-0.569	1.694
10	-2.628	-2.343	-1.905	-1.37	-2.76	-1.678	-1.091	-2.499	-1.023	-0.406	-1.798	-0.325	-3.025	-1.984	-1.998	-1.476	-1.245	-1.182	-1.646	-2.372	-1.219	-2.047	-2.19	-2.853	-3.018	-3.255	-1.94	-1.496	-2.453	-3.427	-1.946	-2.475	-2.351	-0.73	-2.255	-1.31	-3.253	-3.132	-3.199	-1.676	-1.532	-2.187	-2.29	-2.985	-1.645	-1.995	-2.913	-1.99	3.168
11	0.049	0.9	-0.079	-0.244	-1.385	-0.048	0.051	0.7	0.99	0.623	0.35	-0.805	0.268	-0.618	-1.254	0.473	0.679	-0.462	-0.625	0.671	0.839	-0.335	-0.028	0.041	-0.216	-0.003	-0.535	-0.883	-1.994	-0.529	0.034	0.41	-0.072	-0.57	0.183	-1.21	-0.212	-1.217	-1.925	-0.864	-0.216	-0.754	-0.627	-0.107	0.108	-1.087	-0.524	-0.307	4.692
12	-2.802	-2.289	-2.563	-2.346	-2.781	-2.25	-2.149	-2.257	-2.683	-2.833	-2.372	-2.752	-3.037	-2.983	-4.068	-2.008	-2.423	-2.953	-2.733	-3.098	-3.509	-1.93	-2.392	-2.741	-1.613	-1.136	-1.306	-1.518	-0.503	-0.77	-0.768	-1.945	-1.74	-1.446	-1.191	-1.077	-1.921	-1.029	-2.154	-0.969	-1.719	-1.36	-1.087	-1.775	-0.466	-1.194	-0.922	-1.101	3.656
13	-1.307	-1.676	-1.971	-0.886	-0.255	-0.332	-0.218	-1.491	-0.957	-0.389	-1.339	-1.428	0.064	-1.142	-0.942	-1.205	-0.779	-0.598	-1.087	-0.52	-1.1	-0.958	-1.556	-1.121	-2.621	-2.035	-3.006	-2.303	-0.944	-2.131	-1.237	-2.627	-1.944	-2.675	-2.543	-1.958	-0.959	-2.514	-1.605	-2.22	-1.504	-1.699	-2.216	-2.017	-1.085	-1.746	-2.703	-1.977	1.899
14	-2.316	-2.994	-2.113	-1.553	-2.88	-3.486	-1.781	-2.404	-3.242	-2.308	-1.796	-1.427	-2.685	-4.206	-3.621	-2.16	-2.824	-1.911	-1.499	-2.837	-1.442	-1.879	-1.555	-0.977	-1.451	-2.27	-1.827	-2.233	-2.404	-2.517	-2.246	-2.154	-2.365	-1.805	-1.825	-1.917	-2.747	-2.648	-3.599	-1.193	-2.678	-2.125	-1.119	-1.935	-1.303	-2.738	-1.462	-0.649	-0.706
15	-2.121	-0.427	-2.406	-1.467	-1.033	1.339	-1.518	-2.35	-1.192	-1.229	-2.382	0.202	-1.42	-0.532	-3.095	-2.31	-0.988	-1.186	-0.957	-1.157	-0.351	-1.594	-2.372	-2.013	-1.474	0.256	-2.17	-1.09	-1.937	0.888	-1.558	-2.199	-1.663	-0.694	0.58	-0.611	-0.097	-0.384	-2.789	-2.306	-0.136	-1.9	-0.773	-1.37	-0.562	-1.819	-2.334	-2.124	0.143
16	-0.573	-1.881	-0.869	-1.383	-1.306	-1.205	-1.885	-4.09	-1.947	-1.165	-1.365	-0.648	0.096	-1.485	-3.454	-1.718	-0.406	-1.922	-1.73	-1.284	-1.139	-2.205	-3.406	-1.682	0.519	0.6	0.709	-1.379	0.333	0.4	-1.366	-2.49	-0.005	0.312	-0.603	0.272	-0.666	-1.076	-1.761	-1.835	0.488	0.306	-0.778	0.027	0.11	-0.412	-1.786	-2.03	1.622
17	-1.71	0.138	-1.872	-1.582	-0.774	-1.579	-0.166	-1.666	0.24	-1.748	-1.644	-1.528	-1.711	-0.326	-0.363	-1.312	-0.914	-2.039	-1.595	0.013	-1.531	-0.582	-1.025	-1.269	-2.039	-0.27	-1.133	-3.057	-2.028	-2.026	-0.754	-1.511	-1.256	-1.775	-2.253	-2.152	-3.624	-2.098	-1.525	-2.931	-2.512	-1.941	-2.395	-0.479	-2.704	-2.336	-2.291	-1.714	2.992
19	-0.288	-0.42	-2.244	-0.921	-1.876	-1.841	-0.737	-0.661	-1.027	-0.941	-1.898	-1.755	-2.862	-0.447	-2.239	-0.908	-0.646	0.128	0.13	0.395	-0.562	-1.793	-1.496	-1.753	0.088	-0.038	-1.977	0.215	-1.014	-1.385	-0.572	-0.246	-0.938	-0.711	-1.88	-0.709	-2.382	-0.572	-1.534	-0.917	-0.673	-0.648	-0.696	0.02	-0.302	-1.014	-0.894	-1.601	-0.604
20	-0.569	-2.611	-1.832	-1.461	-1.569	-1.558	-1.789	-1.087	-2.112	-1.815	-1.183	-0.993	-0.5	-0.679	-1.845	-2.463	-1.18	-1.349	-2.805	-0.823	-2.019	-1.353	-1.849	-1.418	-0.284	-1.057	-0.614	-0.138	-0.52	-0.885	-0.948	-0.009	-1.682	-0.729	-1.05	-1.065	-0.411	-0.087	-1.23	-1.051	-0.197	-0.862	-1.082	-0.604	-0.965	-0.836	-0.895	-1.706	-0.067
21	-1.035	0.777	-0.834	0.394	0.583	0.844	2.617	1.225	1.101	1.644	1.085	1.39	-0.562	-0.548	-0.003	0.367	0.067	1.07	0.714	1.454	1.293	-0.25	-0.045	0.421	-1.505	0.865	-0.48	0.447	0.366	1.253	1.308	0.885	0.791	0.747	1.185	2.001	-0.263	-0.451	-0.509	0.272	-0.516	1.306	1.128	1.188	1.052	-0.496	0.388	0.92	3.525
22	-1.275	-1.363	-1.305	-1.164	-0.255	-0.074	-0.917	-1.149	-0.854	-0.177	-1.883	-0.784	-0.411	-1.013	-0.659	-2.149	-0.106	-0.917	-0.279	0.103	-0.157	-0.612	-0.849	-0.848	-0.833	-1.202	-0.497	-0.231	-0.483	-0.786	-0.559	-0.756	-0.054	-0.404	-1.259	-0.899	-0.178	-0.465	-0.695	-1.719	-0.593	-0.611	-0.313	-0.366	-0.394	-0.101	-0.961	-1.7	5.338
23	-0.767	-2.882	-3.915	-3.517	-3.055	-0.972	-2.77	-2.519	-1.557	-0.638	-0.215	-3.138	-2.548	-2.585	-2.177	-1.915	-2.705	-1.482	-0.548	-0.57	-1.06	-2.304	-2.445	-2.355	-0.768	-1.657	-4.4	-2.341	-1.912	-1.224	-2.333	-1.345	-1.174	-0.677	0.006	-2.773	-2.157	0.397	-2.248	-1.395	-1.986	-0.908	-1.601	-2.163	-1.401	-0.771	-0.949	-1.736	-0.103
24	-1.551	0.623	-0.228	-0.303	-0.134	-1.244	0.118	0.026	0.666	-2.398	0.252	-2.133	0.624	-2.108	-0.465	0.401	-0.751	-0.958	-0.529	-1.271	-0.319	-0.994	-0.817	-2.315	-1.282	-1.02	-0.898	-0.677	-1.808	-2.185	-1.765	-2.45	-0.515	-0.699	0.214	-1.505	-0.154	-1.826	-1.346	-2.263	-1.361	-0.191	-1.184	-1.668	-0.165	-2.014	-0.336	-2.135	5.937
25	-1.972	-0.054	-2.689	-2.253	-1.611	-1.413	-2.338	-1.89	-1.792	-2.171	-1.946	-2.717	-1.47	-2.218	-2.129	-2.671	-0.162	-3.044	-0.875	-2.848	-2.435	-2.779	-2.1	-3.124	-1.707	0.364	-2.625	-2.455	-1.335	-1.507	-1.735	-1.5	-1.395	-1.914	-1.871	-2.72	-0.717	-1.819	-1.528	-3.083	-0.369	-2.21	-1.168	-1.367	-2.42	-2.337	-1.857	-2.859	0.276
26	-0.036	0.429	0.578	2.251	1.459	1.371	1.325	-0.168	0.181	0.896	1.589	0.94	0.625	-3.269	0.541	-0.265	0.053	0.892	-1.287	1.548	-0.76	-0.328	0.269	-1.538	-0.271	-0.465	-0.009	2.327	0.769	2.2	0.807	-0.769	1.426	0.917	2.551	1.403	0.631	-3.063	0.485	-0.466	0.344	0.981	-1.969	1.211	-0.421	-0.632	-0.465	0.408	3.495
27	-0.98	-0.935	-0.908	-1.645	-0.838	-1.993	-2.199	-1.569	-2.047	-0.997	-1.664	-2.336	-1.434	-1.578	-2.446	-0.746	-2.65	-0.519	-0.865	-1.167	-1.772	-1.443	-1.127	-1.947	-0.318	-1.203	-0.178	-2.299	-0.112	-0.825	-3.665	-2.18	-0.516	-2.441	-2.176	-1.225	-1.941	-1.771	-2.695	-0.67	-2.548	-1.489	-2.679	-1.922	-2.462	-0.668	-1.29	-1.923	-0.376
28	-0.195	-0.77	-1.025	-0.258	-1.015	-0.9	-0.796	-0.871	-1.791	-1.257	-0.167	-0.158	-0.372	-1.409	-1.195	-1.376	-0.953	-0.913	-0.229	-0.768	-0.463	-1.555	-1.867	-1.184	-0.418	-1.163	-1.912	-0.636	-1.669	-0.913	-0.752	-1.939	-0.343	-1.14	-1.626	-0.146	-1.023	-0.501	-1.414	-1.634	-1.114	-1.809	-0.291	-1.774	-0.2	-0.616	-0.513	-1.393	2.832
29	-0.312	-0.646	0	-0.157	-0.694	-0.752	0.274	-0.078	-0.487	1.167	-0.563	0.016	0.147	-1.239	-0.26	-0.1	0.148	-0.924	-0.095	-0.599	-0.559	-0.78	-1.186	-1.078	0.366	0.485	0.141	0.398	-0.002	-0.409	0.666	1.115	0.454	0.871	-0.054	-0.415	0.234	0.219	0.694	0.664	1.015	0.299	-0.326	-0.395	-0.164	-0.201	-0.894	-0.507	4.428
30	-1.8	-1.955	-0.989	0.123	-1.358	-2.295	-3.248	-1.21	-0.362	-1.685	-2.133	-2.309	-1.738	-2.124	-1.058	-2.05	-2.009	-0.745	-1.222	-1.183	-4.238	-1.887	-0.277	-1.396	-1.209	-2.796	-0.959	0.224	-0.195	-1.265	-2.585	-0.791	0.452	-1.852	-1.414	-2.299	-1.42	-2.127	-1.547	-2.675	-1.553	-1.724	-1.093	-1.13	-4.465	-1.513	-1.042	-1.241	3.326
31	-1.623	-2.469	-1.57	-1.348	-1.386	-0.949	-2.154	-1.727	-1.221	-1.887	-1.274	-1.181	-0.794	-1.932	-0.505	-1.251	-1.404	-1.064	-2.254	-1.568	-0.658	-1.327	-1.383	-1.257	-0.975	-1.418	-1.189	-1.087	-0.915	-0.469	-1.331	-1.391	-1.365	-1.58	-1.511	-1.445	-0.379	-1.499	-0.769	-0.659	-1.34	-1.021	-1.804	-1.134	-0.465	-0.466	-1.207	-0.851	0.454
32	-2.626	-0.491	-2.859	0.031	-0.391	-0.644	-1.596	-2.197	-1.82	-2.201	-1.728	-0.71	-1.456	-2.427	-0.097	-2.135	-1.389	-1.36	-2.275	-0.739	-1.236	-0.486	-0.549	-0.192	-3.483	-0.847	-2.489	-0.618	-1.19	-0.383	-0.779	-1.731	-1.428	-1.912	-1.325	0.013	-1.809	-1.931	-0.198	-2.584	-0.977	-0.246	-2.263	-1.949	-0.133	-1.595	-0.469	-0.114	0.192
33	-0.344	-1.147	-1.595	-0.61	-0.29	0.212	-1.124	-1.509	-0.353	-1.413	-1.889	-2.414	-1.221	-1.311	-0.875	-1.789	-1.699	-0.918	-1.092	-1.773	-0.582	-1.183	-0.854	-0.956	-0.779	-1.167	-2.105	-1.369	-1.152	-0.033	-2.004	-1.323	-1.555	-0.977	-1.289	-2.281	-1.355	-1.179	-1.57	-1.577	-1.229	-0.73	-1.639	-2.365	-0.712	-1.412	-1.669	-1.105	-2.36
[truncated: 671 more columns]

## Sheet: P200
Subject	FP1.1	FP1.2	FP1.3	FP1.4	FP1.5	FP1.6	FP1.7	FP1.8	FP1.9	FP1.10	FP1.11	FP1.12	FP1.13	FP1.14	FP1.15	FP1.16	FP1.17	FP1.18	FP1.19	FP1.20	FP1.21	FP1.22	FP1.23	FP1.24	FP2.1	FP2.2	FP2.3	FP2.4	FP2.5	FP2.6	FP2.7	FP2.8	FP2.9	FP2.10	FP2.11	FP2.12	FP2.13	FP2.14	FP2.15	FP2.16	FP2.17	FP2.18	FP2.19	FP2.20	FP2.21	FP2.22	FP2.23	FP2.24	F3.1
1	-1.808	-2.754	-2.16	-3.296	-3.317	-1.858	-3.091	-2.402	-2.526	-1.614	-2.808	-3.123	-2.094	-2.821	-1.379	-2.984	-2.232	-3.181	-2.155	-3.184	-1.161	-3.319	-2.742	-2.318	-2.809	-3.516	-2.557	-4.1	-3.298	-2.618	-3.152	-3.022	-2.553	-3.013	-3.379	-3.53	-2.609	-3.296	-1.557	-3.669	-3	-4.498	-3.299	-3.561	-2.111	-3.078	-3.076	-2.112	-1.764
2	-1.57	-2.242	-0.633	0.93	-2.165	0.502	-1.34	0.997	-1.74	-1.113	-1.23	0.971	0.29	-0.835	0.684	0.334	0.301	0.245	-0.337	0.388	-1.179	-0.903	0.456	0.098	-0.238	-2.076	0.789	0.716	-2.289	1.414	-0.798	1.314	-0.799	0.7	-0.998	-0.138	0.508	-0.529	1.404	1.228	0.1	0.451	-0.075	1.406	-1.854	-0.081	0.199	0.697	4.361
3	-2.46	-3.016	-2.967	-2.215	-1.07	-1.71	-0.754	-2.364	-0.893	-1.752	-1.996	-3.384	-1.611	-1.427	-2.966	-1.943	-0.796	-1.501	-0.931	-1.521	-3.658	-1.625	-1.615	-2.782	-1.912	-2.229	-1.7	-1.448	-0.191	-1.944	-1.76	-1.714	-0.877	-0.915	-1.158	-2.642	-0.852	-0.49	-2.147	-0.849	0.334	-1.406	-0.021	-1.739	-2.74	-0.973	-0.92	-1.484	-2.992
4	0.159	-0.616	-3.356	-0.11	-1.361	-1.063	-2.428	-1.677	-0.197	-0.662	-1.579	-1.87	-0.879	-1.075	-1.766	-1.864	0.34	-0.855	-1.02	-0.736	-0.681	-1.061	-1.149	-0.913	0.683	0.103	-1.207	-0.015	-0.559	-0.441	-1.293	-0.609	0.7	-0.819	-0.598	-0.876	-1.05	-0.442	-0.737	-1.562	0.512	0.584	-0.348	0.824	0.074	0.206	-0.28	-0.559	-0.504
5	-0.955	0.513	-0.182	-1.697	-2.306	-1.688	-1.285	-0.839	-1.924	-1.043	-1.695	-1.935	0.142	-1.251	-0.491	-0.943	-1.916	-1.672	-0.141	-1.418	-0.675	-0.675	-1.384	-1.479	-1.27	-0.81	-0.533	-0.899	-2.577	-2.329	-1.448	-1.161	-2.984	-1.153	-1.83	-2.178	0.318	-1.581	-0.784	-0.372	-0.813	-0.926	0.238	-2.046	-1.033	-1.25	-1.055	-1.385	-0.289
7	-1.739	1.989	-1.207	-1.021	0.533	-0.289	0.599	1.782	-0.111	-0.794	-0.846	0.728	-0.395	0.774	0.944	0.956	-0.335	-0.636	0.796	0.543	-0.275	-0.656	-0.928	-0.607	-1.344	1.713	-0.712	-0.335	-0.602	-0.178	0.306	1.147	0.02	-0.5	-1.175	1.009	-0.317	0.633	0.254	0.599	0.254	-0.349	0.147	0.005	0.008	-0.864	-0.72	-0.279	-1.196
8	0.977	0.004	0.701	-1.204	-1.209	1.318	-0.668	-0.305	-0.15	-1.313	-2.081	-1.88	-0.09	-0.356	0.588	0.347	-1.339	0.294	-0.101	-0.846	0.899	0.158	0.093	-0.092	-0.106	-0.974	-0.078	-0.26	-0.858	1.666	0.48	0.734	-0.688	0.006	-0.339	-1.002	-0.102	-0.076	0.347	0.667	-0.274	0.296	1.005	-0.851	0.571	-0.052	-0.7	-0.554	3.558
9	-1.47	-0.297	-0.377	-3.027	0.078	-0.134	-0.586	-1.11	-1.172	-0.646	-0.58	-0.141	-0.006	-0.797	-0.203	-0.298	-0.671	1.216	0.778	-1.198	-0.722	0.347	-0.222	0.019	-0.2	-0.987	-0.799	-2.119	-1.735	-0.454	-0.902	-1.126	0.2	-1.618	-0.407	-0.148	-1.066	-0.414	-1.146	-0.087	-0.993	1.02	-0.671	-2.32	-1.162	-0.098	-1.385	-0.472	1.951
10	-1.637	-0.016	-0.028	0.211	-1.483	-0.177	-0.022	-0.857	0.01	-0.915	-1.076	0.288	-0.693	0.239	0.149	-1.135	0.098	0.581	1.075	-0.066	0.822	-0.466	0.693	-1.6	-1.256	0.254	0.189	0.014	-0.653	-1.152	-0.883	-0.922	-0.339	-0.822	-0.855	-0.01	0.283	-0.305	0.13	-1.189	0.943	0.498	0.778	0.433	1.257	-0.269	0.141	-0.152	-0.559
11	0.268	-0.173	-0.034	0.192	-1.203	-0.799	-0.604	0.292	0.639	-0.127	0.357	-0.442	0.006	-0.405	-1.048	-0.177	0.181	-0.502	-0.54	-0.264	0.292	-0.262	-0.646	-0.308	0.192	-0.503	-0.197	-0.368	-1.717	-0.719	-0.338	0.36	0.012	-1.348	-0.021	-1.012	-0.383	-0.872	-1.136	-0.899	-0.233	-0.648	-0.604	-0.59	0.01	-0.072	-0.375	-0.429	0.49
12	-3.504	-2.674	-2.67	-3.523	-3.852	-3.281	-2.307	-3.379	-3.422	-2.551	-3.749	-3.352	-3.218	-3.132	-3.584	-2.836	-3.415	-3.78	-2.536	-3.572	-4.461	-2.459	-2.358	-3.444	-3.133	-2.113	-2.364	-3.293	-1.669	-1.857	-1.173	-2.894	-3.338	-2.297	-2.834	-2.123	-2.768	-1.582	-2.793	-2.037	-2.997	-2.883	-2.069	-3.067	-2.166	-2.537	-1.757	-3.005	0.272
13	-0.268	-0.822	0.405	-0.721	-0.557	-0.243	0.512	-0.49	0.05	0.117	-0.496	-0.146	0.529	-0.803	-0.042	-0.475	0.288	0.594	-0.542	-0.415	-0.387	0.337	-0.822	-0.38	-1.949	-0.589	-0.643	-1.651	-1.319	-1.5	-0.229	-2.145	-0.302	-1.429	-1.933	-0.728	0.002	-1.696	-0.892	-1.531	-0.277	-0.426	-1.17	-1.784	0.295	-0.366	-1.893	-1.11	-0.038
14	-2.4	-4.882	-3.213	-1.214	-3.307	-4.587	-3.266	-3.78	-3.984	-1.795	-2.627	-2.513	-3.803	-4.861	-3.704	-2.687	-4.32	-3.563	-2.492	-2.751	-3.583	-4.142	-2.924	-2.995	-3.41	-5.193	-4.196	-2.48	-3.999	-3.607	-5.144	-4.487	-3.749	-2.341	-3.832	-3.734	-3.908	-4.279	-4.451	-2.678	-5.09	-4.92	-3.821	-3.048	-3.513	-4.418	-3.744	-3.542	-7.715
15	-2.282	-0.567	-2.014	-0.947	-1.861	-1.778	-1.715	-1.535	-2.95	-2.068	-3.564	0.094	-1.3	-2.249	-1.954	-2.641	-2.084	-0.614	-0.579	-1.439	-1.391	-1.881	-2.065	-1.283	-1.52	-0.968	-2.449	-0.173	-1.992	-1.767	-2.118	-1.527	-2.902	-1.365	-1.102	-0.793	-0.218	-2.4	-1.713	-2.676	-1.627	-1.217	-0.385	-1.362	-1.238	-1.376	-2.162	-2.145	-2.177
16	1.55	0.318	-1.367	-0.102	-1.482	-0.37	-0.018	-2.096	0.355	0.327	1.325	-0.02	-0.707	-0.824	-1.065	-0.613	1.037	-0.063	0.15	1.138	0.302	-2.679	-1.493	0.621	1.49	0.485	0.101	0.949	0.514	0.725	-0.534	-1.332	0.82	1.935	1.461	1.725	-0.488	-1.583	-0.351	-1.45	1.432	0.484	1.144	0.849	1.021	-0.899	-1.065	-0.698	-2.87
17	-1.98	-1.01	-2.492	-0.908	-0.279	-1.414	-1.063	-1.862	-1.484	-2.438	-3.402	-0.881	-1.201	-0.546	-1.754	-2.816	-0.983	-1.705	-1.509	-0.285	-1.064	-1.108	-0.662	-1.204	-1.809	-1.41	-0.182	-2.195	-0.554	-1.377	-0.604	-1.01	-2.126	-2.27	-3.402	-2.249	-1.673	-1.38	-1.892	-3.044	0.038	-2.27	-1.864	-1.349	-1.469	-1.572	-1.547	-2.052	-0.404
19	1.536	-0.218	-2.02	0.837	-0.364	0.139	-0.401	-1.444	0.377	-0.109	-1.233	-0.841	-1.419	0.428	0.587	0.925	0.633	-0.209	1.801	1.51	1.402	-0.78	0.624	1.045	0.851	-0.63	-2.359	0.924	-0.214	-0.732	-0.969	-1.731	-0.483	-0.012	-1.998	-0.663	-1.539	-0.462	0.005	-0.714	0.041	-0.78	0.655	0.762	0.8	-0.421	0.092	-0.268	-3.776
20	-0.236	-2.282	-1.531	-0.081	-0.511	-0.964	-0.811	-0.177	-1.131	-1.25	-0.681	-0.447	0.321	-0.608	-0.594	-1.799	-0.72	-0.632	-1.488	-0.157	-1.535	0.214	-0.865	-0.412	0.203	-0.411	-0.584	0.813	0.395	-0.218	0.115	0.499	-0.821	0.041	-0.429	-0.048	0.181	0.062	-0.032	-0.525	-0.098	0.043	-0.175	0.208	-0.394	0.257	-0.164	-0.73	-0.71
21	-2.497	-0.818	-2.174	-1.407	-1.495	-1.385	2.065	-0.356	-0.931	-0.127	-2.029	-0.686	-1.216	-1.574	-0.683	-1.047	-0.547	-0.867	-0.05	0.146	0.089	-0.691	-0.876	-1.272	-2.408	-1.063	-2.613	-1.607	-1.717	-1.1	0.081	-0.74	-1.265	-0.847	-2.021	-1.104	-1.642	-1.477	-1.523	-1.052	-1.726	-1.061	-0.21	-0.756	-0.868	-0.527	-0.987	-0.893	-0.092
22	-0.16	-0.977	-2.132	-1.129	-0.711	-0.765	-0.806	-1.031	-0.7	0.554	-1.469	-0.19	-0.438	-0.455	0.19	-0.937	0.689	-1.19	-0.411	0.175	-0.121	-0.391	-0.818	0.042	-0.122	-1.115	-1.29	-0.092	-0.955	-1.463	-0.482	-1.046	-0.632	-0.357	-1.53	-0.781	-0.896	-0.355	-0.088	-1.276	-0.157	-0.814	-0.953	-0.463	-0.579	-0.401	-0.766	-1.073	3.694
23	1.111	-2.495	-1.655	-1.753	-2.246	-0.613	-0.913	-1.007	-0.08	-0.025	-0.405	-2.02	-1.875	-1.646	-0.973	-1.331	-1.455	0.24	-0.398	0.616	0.052	-0.635	-1.777	-1.012	0.522	-1.356	-2.04	-1.823	-1.305	-1.083	-1.606	-0.475	0.306	-0.912	-0.693	-3.019	-2.181	0.255	-0.814	-0.625	-1.025	-0.384	-2.137	-1.003	-1.325	-0.333	-1.544	-1.226	-0.799
24	-0.706	0.03	-0.821	-1.271	0.592	-0.789	-0.3	1.027	0.22	-3.32	0.188	-2.233	0.809	-1.51	-0.257	0.54	-0.623	-0.988	-0.481	-1.227	-0.709	-0.063	0.088	-1.788	-1.007	-1.371	-1.182	-1.363	-0.803	-1.726	-2.789	-2.025	-1.274	-2.818	0.168	-1.994	-0.956	-1.921	-0.382	-3.12	-1.571	-0.139	-1.94	-2.054	-0.992	-2.446	-0.805	-2.283	3.69
25	-2.898	-1.994	-2.112	-2.875	-2.554	-2.298	-2.666	-2.586	-2.858	-2.211	-2.58	-4.164	-3.16	-3.209	-3.541	-2.488	-1.23	-3.068	-1.751	-4.236	-2.763	-2.987	-2.998	-3.359	-2.238	-1.09	-2.038	-2.76	-2.17	-2.206	-1.841	-2.224	-2.91	-1.01	-3.162	-3.944	-2.322	-2.72	-1.915	-2.804	-1.01	-2.257	-1.662	-2.1	-2.622	-2.67	-2.823	-3.271	-1.729
26	-0.676	-2.123	0.036	-0.662	-0.774	-0.107	-0.958	-2.627	-2.27	-0.754	0.017	0.381	-2.622	-2.347	-1.585	-2.98	-1.167	-2.57	-1.275	-0.725	0.244	-3.206	-0.498	-2.72	-2.2	-2.571	-1.524	-1.809	-2.991	-0.059	-2.072	-4.074	-1.319	-1.542	-0.9	0.729	-3.064	-3.083	-2.316	-2.069	-1.901	-2.5	-2.059	-0.855	-0.836	-3.874	-1.863	-2.165	2.696
27	-1.724	-1.991	-2.131	-3.221	-2.677	-3.006	-3.409	-1.639	-3.035	-1.969	-2.472	-2.522	-2.248	-2.763	-3.929	-1.928	-3.431	-2.042	-1.54	-2.228	-2.224	-3.031	-1.849	-2.133	-1.88	-2.249	-1.917	-3.756	-2.304	-2.342	-5.579	-2.109	-2.512	-3.651	-4.136	-2.475	-3.288	-3.182	-4.568	-2.105	-3.12	-2.405	-3.704	-3.418	-3.337	-1.714	-3.136	-2.956	1.421
28	-1.518	-2.966	-2.927	-1.586	-1.466	-2.154	-1.67	-2.269	-3.45	-1.429	-1.358	-1.977	-1.395	-1.986	-2.406	-2.189	-1.767	-0.586	-2.895	-1.771	-1.696	-3.457	-2.96	-1.485	-0.87	-3.001	-2.998	-1.686	-1.321	-1.408	-1.402	-3.388	-2.361	-1.005	-2.223	-2.186	-1.905	-0.008	-0.852	-1.227	-1.61	-1.654	-1.186	-2.28	-0.826	-1.223	-1.783	-1.334	-4.264
29	-1.282	-1.619	-0.977	-1.818	-1.677	-1.112	-0.545	-0.89	-1.347	-0.929	-1.045	-1.402	-1.47	-1.718	-1.315	-0.922	-0.931	-1.115	-1.394	-2.102	-1.284	-1.276	-2.289	-1.661	-1.025	-1.312	-1.254	-1.788	-1.099	-1.228	-0.472	-0.674	-1.167	-1.807	-1.37	-1.937	-1.831	-0.705	-0.742	-0.469	0.003	-0.856	-1.675	-0.782	-1.524	-2.023	-2.222	-1.679	-1.243
30	-2.496	-2.6	-0.596	-0.727	-1.281	-1.355	-3.51	-3.033	-0.773	-2.519	-2.446	-1.416	-1.529	-1.338	-0.564	-1.199	-2.122	-1.112	-2.135	-0.884	-2.975	-1.599	-0.827	-0.606	-1.14	-2.454	0.111	-0.927	-0.297	0.034	-1.804	-1.257	-0.464	-0.886	-0.442	-0.964	-0.81	-1.012	-1.588	-1.564	-1.583	-1.157	-1.002	-0.245	-2.54	-1.348	-0.687	-0.194	5.69
31	-2.1	-1.903	-1.294	-0.79	-1.795	-1.22	-1.733	-0.99	-0.866	-1.509	-1.51	-1.152	-1.418	-1.428	-1.418	-0.281	-0.836	-0.112	-2.312	-2.679	-0.909	-0.838	-1.913	-1.406	-1.111	-0.814	-0.406	-0.49	-1.224	-0.195	-0.672	-0.306	-0.275	-0.863	-1.691	-0.78	-0.78	-0.894	-0.929	0.148	-0.263	0.13	-1.498	-2.114	-0.09	-0.184	-1.276	-0.816	0.436
32	-3.202	-1.162	-3.431	-0.246	-1.306	-0.351	-2.189	-2.655	-1.955	-3.056	-2.124	-2.056	-2.628	-2.977	-0.382	-1.374	-1.629	-1.203	-2.043	-0.845	-2.156	-1.84	-0.705	-0.343	-3.493	-0.521	-2.191	-0.779	-1.394	0.044	-0.384	-2.259	-1.518	-2.478	-1.027	-0.917	-2.18	-1.957	0.362	-1.688	-0.255	1.174	-0.849	-1.389	-0.585	-2.038	-0.148	0.382	-4.099
33	-1.39	-2.223	-2.553	-1.433	-1.668	-0.612	-1.442	-1.865	-2.201	-1.489	-1.322	-3.502	-0.349	-2.07	-2.062	-1.828	-2.019	-1.98	-2.027	-1.873	-0.002	-2.224	-1.655	-1.299	-2.048	-1.424	-3.612	-2.238	-2.532	-0.823	-2.421	-2.104	-3.176	-1.374	-2.66	-3.718	-2.041	-2.256	-1.985	-1.946	-2.581	-2.058	-2.465	-3.167	-0.726	-2.868	-2.321	-1.883	-1.537
[truncated: 671 more columns]

## Sheet: N250
Subject	FP1.1	FP1.2	FP1.3	FP1.4	FP1.5	FP1.6	FP1.7	FP1.8	FP1.9	FP1.10	FP1.11	FP1.12	FP1.13	FP1.14	FP1.15	FP1.16	FP1.17	FP1.18	FP1.19	FP1.20	FP1.21	FP1.22	FP1.23	FP1.24	FP2.1	FP2.2	FP2.3	FP2.4	FP2.5	FP2.6	FP2.7	FP2.8	FP2.9	FP2.10	FP2.11	FP2.12	FP2.13	FP2.14	FP2.15	FP2.16	FP2.17	FP2.18	FP2.19	FP2.20	FP2.21	FP2.22	FP2.23	FP2.24	F3.1
1	-1.458	-2.76	-1.045	-2.59	-2.741	-1.39	-2.456	-1.862	-2.244	-1.39	-2.102	-2.09	-1.368	-1.776	-0.328	-2.389	-1.725	-3.113	-1.429	-2.213	0.093	-2.963	-1.557	-2.183	-2.343	-3.536	-1.365	-3.06	-2.735	-2.273	-2.679	-2.214	-2.466	-2.327	-3.048	-2.546	-1.718	-2.511	-0.574	-2.89	-2.622	-4.141	-2.562	-2.388	-0.94	-2.257	-2.296	-1.635	-3.046
2	-1.766	-2.118	-2.378	-0.077	-3.115	-0.977	-2.858	-0.65	-3.439	-2.288	-2.388	-0.177	-1.509	-1.751	-1.463	-0.525	-0.954	-1.537	-1.233	-1.188	-1.81	-1.957	-1.045	-2.053	0.903	-1.355	0.929	1.159	-1.916	1.117	-0.235	1.239	-0.832	0.525	-0.311	0.695	-0.186	-0.781	0.492	0.315	0.163	-0.441	0.326	1.053	-1.621	-0.726	-0.804	-1.259	2.444
3	-2.769	-3.653	-2.562	-2.284	-1.595	-1.798	-0.787	-2.49	-1.577	-2.082	-2.15	-3.104	-1.504	-2.223	-2.476	-2.018	-1.486	-1.278	-1.112	-1.86	-3.459	-1.692	-1.562	-3.601	-2.838	-2.766	-1.576	-1.291	-0.678	-2.202	-1.981	-1.904	-1.273	-0.786	-1.511	-1.949	-0.934	-1.007	-1.005	-0.472	0.275	-1.069	-0.176	-1.586	-1.784	-0.879	-1.217	-2.024	-5.623
4	-0.982	-1.572	-3.469	-0.91	-1.673	-2.186	-2.408	-2.619	-0.604	-1.138	-1.079	-1.654	-0.596	-1.102	-1.998	-1.691	-0.009	-0.739	-0.612	-0.259	-0.734	-0.297	-1.085	-0.387	0.268	0.268	-0.668	0.644	-0.064	-0.236	-0.302	-1.112	1.126	0.096	0.276	-0.083	0.128	0.075	-0.683	-0.711	0.774	1.092	0.596	1.169	0.643	0.86	0.362	-0.028	0.157
5	-0.956	-0.68	-0.321	-1.582	-2.043	-2.182	-1.251	-0.596	-1.724	-2.068	-1.197	-2.081	-0.898	-1.667	-2.021	-1.444	-2.649	-2.525	-0.327	-1.424	-1.002	-1.131	-1.898	-2.596	-1.881	-1.919	-1.388	-1.254	-2.29	-2.929	-1.806	-1.509	-3.514	-2.005	-2.109	-2.057	-0.024	-1.794	-2.003	-1.327	-1.05	-0.96	0.642	-1.83	-0.939	-1.753	-1.504	-1.893	-0.363
7	-0.957	2.458	-0.77	-0.273	1.188	0.101	0.765	2.446	0.181	-0.317	-0.218	0.404	0.384	0.535	1.076	1.755	-0.056	-0.253	1.647	0.578	0.303	-0.099	0.209	-0.263	-1.136	1.703	-1.009	0.244	-0.453	-0.175	0.467	1.249	-0.173	-0.281	-1.009	0.515	0.182	0.457	0.459	1.099	0.217	-0.004	0.362	-0.069	0.226	-0.569	-0.047	-0.125	-1.735
8	2.903	1.303	1.687	-0.062	0.34	2.238	0.553	1.141	1.166	0.033	-0.627	-0.229	0.472	0.13	1.506	1.369	0.428	1.394	1.061	-0.11	1.934	0.575	1.137	1.282	1.41	-0.06	0.715	0.051	-0.216	2.334	1.105	1.22	0.514	0.187	0.826	0.155	-0.114	0.164	0.632	1.151	0.631	0.894	1.874	-0.325	0.998	0.162	-0.117	0.287	4.505
9	-0.925	0.09	0.192	-3.123	0.076	-0.009	-0.172	-0.52	-1.042	-0.912	-0.581	-0.197	0.073	-0.068	0.503	0.051	-0.347	0.674	0.733	0.18	-0.467	0.132	0.123	0.699	-0.149	-1.153	-0.131	-2.596	-2.451	-0.984	-0.724	-1.219	0.453	-1.805	-0.774	-1.064	-1.435	-0.419	-0.857	-0.227	-0.659	0.636	-0.788	-1.306	-1.366	-0.418	-1.086	-0.438	1.106
10	-1.356	0.586	0.015	2.521	-0.803	0.799	0.405	0.751	0.739	-0.299	-0.634	0.605	-0.43	1.708	0.48	-0.191	1.845	0.675	2.06	1.438	1.128	0.574	1.415	0.117	-0.414	0.945	0.524	3.119	1.021	0.256	0.579	2.088	0.356	0.331	0.485	0.729	1.562	1.511	1.112	0.768	2.785	1.169	1.413	2.443	2.396	0.961	2.252	1.862	-2.995
11	0.645	0.694	0.086	0.479	-0.946	0.009	0.036	0.53	0.398	0.865	0.609	0.018	0.362	0.154	-0.355	0.245	0.048	-0.043	-0.064	-0.052	0.995	0.349	-0.154	-0.085	0.34	0.102	-0.204	-0.324	-1.426	0.037	0.66	0.709	-0.072	0.027	0.171	-0.353	-0.18	-0.343	-0.355	-0.472	0.062	-0.057	-0.213	-0.247	0.854	-0.014	-0.088	0.1	2.032
12	-1.946	-1.754	-1.919	-2.261	-2.931	-1.717	-1.437	-2.271	-2.094	-1.448	-2.251	-1.89	-2.51	-2.435	-3.07	-2.124	-2.57	-2.62	-1.631	-3.049	-3.611	-2.101	-2.111	-2.592	-2.358	-1.662	-1.656	-2.17	-1.486	-0.879	-0.816	-2.119	-2.347	-1.422	-1.417	-1.258	-1.887	-1.285	-1.766	-1.601	-1.993	-1.662	-0.623	-2.106	-1.31	-1.983	-1.187	-1.987	-2.696
13	-0.189	0.144	1.446	-0.054	0.504	0.028	2.39	0.701	1.243	1.043	1.34	0.354	1.86	0.837	0.749	1.043	1.31	1.624	1.634	1.044	1.047	0.868	0.199	0.768	-1.394	-0.435	-0.058	-0.991	-0.09	-1.186	0.981	-0.791	0.587	-0.798	-0.311	-0.348	1.615	-0.277	0.252	0.107	1.226	0.491	0.394	0.17	1.591	0.88	-0.228	-0.043	-2.588
14	-0.79	-1.901	-2.2	-0.279	-1.776	-3.049	-2.509	-3.228	-2.246	-1.003	-1.425	-1.254	-2.291	-3.456	-3.012	-1.844	-3.501	-1.486	-0.695	-2.968	-2.14	-2.108	-0.097	-1.13	-1.261	-2.925	-3.097	-2.056	-3.213	-3.036	-4.469	-3.586	-2.449	-2.033	-2.844	-3.196	-3.171	-3.714	-4.004	-2.552	-4.388	-3.717	-2.493	-3.669	-3.062	-3.696	-2.153	-2.241	-4.949
15	-1.711	-0.062	-2.244	0.018	-1.152	0.195	-1.314	0.003	-2.026	-1.604	-2.401	0.964	-0.919	-0.587	-1.637	-1.52	-0.837	-0.542	-0.356	-1.396	0.769	-0.497	-0.944	0.667	-1.606	-0.494	-2.381	-0.39	-2.676	-0.551	-2.32	-0.205	-2.399	-2.459	-0.737	-0.914	0.018	-0.822	-2.54	-1.265	-1.055	-1.63	-1.149	-1.648	-0.938	-1.943	-1.435	-1.553	-3.321
16	1.834	1.301	0.189	0.449	-0.445	0.45	0.054	0.916	1.607	1.175	0.874	1.821	0.656	-0.644	-1.664	0.339	2.966	0.534	-0.372	2.099	1.046	-0.697	-1.17	2.208	2.081	1.547	1.029	1.581	1.758	1.466	0.291	1.752	2.764	2.843	0.736	2.939	0.849	-0.568	-0.304	0.587	3.43	1.973	1.094	2.723	2.034	0.291	-0.375	1.648	-3.937
17	-0.689	-0.88	-1.106	0	0.546	-0.235	-0.159	-0.438	-0.233	-0.854	-1.781	-0.073	-0.067	1.218	0.42	-1.278	-0.793	0.098	-0.392	0.175	0.555	0.031	0.335	-0.817	-0.669	-0.61	1.356	-0.618	0.308	-0.198	-0.16	0.757	-0.184	-0.726	-1.74	-0.802	-0.625	0.677	0.578	-1.003	0.363	0.132	-0.302	0.683	0.998	-0.178	-0.451	0.14	-0.333
19	0.224	-0.977	-2.775	-0.197	-0.888	-0.755	-2.89	-2.185	-0.787	-0.415	-1.746	-0.942	-1.932	-0.615	-0.266	0.431	0.261	-1.032	0.841	0.425	0.581	-1.322	-0.272	-0.39	-0.304	-1.526	-3.368	-0.39	-0.949	-1.621	-2.807	-2.413	-1.933	-0.75	-3.244	-0.914	-2.107	-1.298	-0.562	-0.926	-0.428	-1.303	-0.342	-0.395	0.056	-1.748	-0.322	-0.974	-3.742
20	0.065	-1.109	-0.319	0.664	-0.526	-1.156	-0.105	0.183	-0.902	-1.32	-0.145	-0.611	0.837	0.088	0.453	-0.668	-0.364	0.193	-1.268	0.117	-1.157	1.193	-0.355	0.382	0.638	0.169	0.223	1.104	0.298	-0.564	0.442	0.688	-1.15	-0.162	-0.075	-0.229	0.573	0.558	0.648	0.069	-0.203	0.229	-0.579	0.305	-0.12	0.865	-0.217	0.547	-1.793
21	-1.628	0.416	-1.566	-1.392	-0.202	-0.363	2.693	1.175	0.011	0.791	-0.814	-0.069	-1.718	-0.919	-0.342	-0.705	0.432	-0.353	0.274	0.816	0.056	-0.204	-0.91	-0.986	-1.634	-0.119	-2.099	-1.604	-1.153	0.342	0.66	0.796	-0.055	-0.362	-1.594	0.207	-1.793	-0.578	-1.015	-0.913	-0.86	-0.429	-0.161	-0.257	-0.559	-0.432	-1.054	-0.481	-0.837
22	0.161	-0.624	-0.611	0.198	0.085	0.261	-0.146	-0.198	0.625	0.806	-0.751	0.72	-0.133	-0.534	0.982	-0.646	0.668	-0.375	0.436	0.26	0.689	0.367	-0.556	0.839	-0.426	-1.058	-0.19	1.084	-0.055	-1.061	0.31	-0.515	0.067	-0.169	-1.151	-0.383	-1.016	-0.483	0.398	-1.297	-0.058	0.048	-0.204	-0.186	0.008	0.324	-0.47	-0.328	4.514
23	1.489	-2.183	-1.825	-0.778	-2.633	-0.571	0.205	-1.424	-0.292	-0.098	0.408	-1.358	-0.919	-0.521	-0.55	-0.219	-0.918	0.679	0.496	1.659	1.131	0.44	-0.756	0.13	0.907	-1.338	-2.861	-1.444	-1.299	-1.268	-0.679	-0.749	-0.472	-1.079	-0.011	-2.727	-1.919	0.759	-0.905	0.336	-1.317	0.304	-1.581	0.548	-0.787	-0.244	-0.324	-0.511	-3.031
24	0.004	1.244	-0.796	0.034	1.308	-0.362	0.594	1.065	0.746	-2.564	0.714	-1.69	1.287	-0.504	0.128	0.614	0.068	-0.469	-0.293	-0.77	0.007	1.182	0.794	-0.682	0.679	-0.642	-0.579	-0.898	0.164	-0.89	-2.059	-1.558	1.415	-1.387	1.558	-1.797	0.083	-0.644	0.79	-1.395	-0.17	0.121	-0.382	0.039	0.835	-0.428	0.617	-0.044	3.598
25	-2.029	-1.235	-0.881	-2.714	-2.157	-0.971	-2.004	-2.551	-2.963	-1.454	-3.034	-3.671	-1.908	-2.342	-3.19	-2.364	-0.961	-1.987	-1.806	-2.909	-3.184	-3.42	-2.286	-3.168	-2.331	-1.433	-1.979	-2.683	-1.818	-1.996	-1.584	-2.21	-3.109	-1.586	-3.586	-4.369	-1.504	-1.929	-2.383	-2.45	-0.945	-1.649	-1.878	-2.269	-3.524	-3.3	-2.026	-2.965	-2.862
26	-0.842	-1.517	-0.668	-0.151	-0.61	-0.469	-0.067	-2.775	-2.375	-2.004	-1.165	-0.233	-2.493	-3.055	-2.687	-3.368	-2.087	-2.666	-3.095	-1.302	-1.512	-3.697	-0.442	-2.571	-1.636	-1.73	-1.606	-1.678	-1.98	-0.945	-1.062	-2.951	-1.913	-1.989	-1.102	-0.394	-2.964	-3.371	-3.237	-1.882	-2.746	-2.549	-3.443	-1.484	-2.761	-4.037	-1.085	-2.663	3.669
27	0.188	0.004	0.129	-2.072	-0.387	-1.358	-0.225	-0.475	-1.577	-0.656	-0.915	-1.189	-0.999	-1.512	-1.856	-0.247	-1.238	-0.853	-0.119	-0.49	-0.545	-2.053	-0.832	-0.937	-0.634	-2.017	-0.132	-3.509	-1.167	-2.149	-3.428	-0.791	-1.838	-3.308	-2.989	-2.001	-2.763	-1.923	-3.372	-0.702	-2.059	-1.393	-2.187	-2.306	-2.026	-1.943	-2.041	-2.261	1.863
28	-1.194	-2.156	-3.556	-2.777	-2.214	-2.757	-1.84	-2.867	-3.563	-2.05	-1.674	-2.784	-2.297	-2.752	-2.683	-3.058	-2.412	-1.493	-3.23	-1.793	-1.878	-2.78	-3.644	-2.087	-1.081	-2.304	-3.026	-1.972	-1.373	-1.864	-0.96	-3.392	-2.152	-0.889	-1.902	-2.405	-2.644	-0.808	-0.939	-1.43	-1.903	-1.562	-1.321	-1.55	-0.757	-1.377	-2.113	-1.22	-4.01
29	-1.223	-1.441	-1.013	-1.752	-1.009	-0.54	0.585	-0.16	-0.493	-0.932	-0.438	-0.994	-0.72	-1.422	-0.644	-0.22	-0.911	-0.918	-1.547	-2.11	-0.632	-0.617	-1.61	-1.214	-1.057	-2.038	-1.412	-2.205	-0.646	-0.86	-0.276	-0.39	-0.231	-1.958	-1.924	-2.133	-1.297	-1.235	-1.554	0.051	-0.664	-1.116	-1.428	-1.23	-1.579	-1.372	-1.907	-1.892	-2.489
30	-1.634	-0.621	0.225	-0.526	-0.68	-0.898	-2.99	-0.96	-0.733	-1.358	-1.985	-1.216	-1.438	-1.669	-1.005	-0.322	-1.346	-1.497	-2.113	-1.378	-2.133	-1.853	-1.276	-0.217	-0.095	-1.704	0.818	-1.294	0.722	0.389	-0.881	0.009	-1.13	-0.307	0.023	-0.714	-0.607	-1.175	-0.921	-0.4	-1.14	-1.408	-0.027	0.07	-1.288	-0.578	-0.653	-0.274	4.014
31	-1.417	-1.376	-1.259	-0.371	-1.042	-0.531	-1.422	-0.695	0.023	-1.47	-0.148	-0.309	-0.728	-1.02	-0.801	0.245	-0.009	0.348	-1.524	-1.897	-0.369	-0.367	-1.173	-1.308	-0.166	-0.549	-0.557	-0.322	-0.937	0.073	-0.683	-0.342	0.464	-1.137	-0.331	-0.354	-0.446	0.162	-0.316	0.566	-0.12	0.272	-0.243	-1.01	-0.125	0.523	-0.788	-0.366	-2.06
32	-2.767	-1.534	-2.767	-0.581	-2.103	-0.441	-2.735	-2.56	-2.361	-2.691	-2.184	-1.344	-2.685	-2.827	-0.593	-1.414	-1.374	-2.073	-1.509	-0.612	-1.707	-1.876	-1.086	-1.023	-2.891	0.078	-1.334	-0.287	-1.276	0.697	-0.054	-1.635	-1.162	-1.624	-0.05	-0.144	-1.886	-0.778	0.794	-1.031	0.284	0.971	0.235	-0.732	0.447	-1.583	-0.262	1.236	-3.486
33	-1.366	-1.888	-2.331	-1.409	-1.78	-0.905	-0.826	-1.661	-1.28	-2.026	-2.453	-3.756	-0.279	-2.134	-1.777	-1.28	-2.212	-2.069	-1.393	-1.515	0.297	-1.793	-1.736	-1.773	-2.461	-1.92	-3.204	-2.436	-2.574	-1.215	-2.201	-2.263	-2.345	-2.655	-2.933	-4.19	-1.718	-2.148	-2.562	-2.043	-2.51	-2.107	-1.985	-2.34	-0.639	-2.214	-2.307	-2.133	-1.093
[truncated: 671 more columns]

## Sheet: LPC
Subject	FP1.1	FP1.2	FP1.3	FP1.4	FP1.5	FP1.6	FP1.7	FP1.8	FP1.9	FP1.10	FP1.11	FP1.12	FP1.13	FP1.14	FP1.15	FP1.16	FP1.17	FP1.18	FP1.19	FP1.20	FP1.21	FP1.22	FP1.23	FP1.24	FP2.1	FP2.2	FP2.3	FP2.4	FP2.5	FP2.6	FP2.7	FP2.8	FP2.9	FP2.10	FP2.11	FP2.12	FP2.13	FP2.14	FP2.15	FP2.16	FP2.17	FP2.18	FP2.19	FP2.20	FP2.21	FP2.22	FP2.23	FP2.24	F3.1
1	-1.824	-2.223	-1.304	-1.575	-1.764	-1.476	-3.179	-2.991	-2.167	-0.283	-1.947	-2.011	-1.546	-0.768	-0.794	-2.501	-0.194	-1.787	-1.783	-2.971	-0.395	-2.529	-0.538	-2.205	-1.212	-2.463	-0.808	-0.899	-1.839	-1.581	-1.581	-2.777	-1.321	-1.215	-1.961	-2.116	-1.133	-0.511	-0.026	-1.726	-0.915	-2.728	-1.519	-1.681	-0.087	-1.294	-0.573	-0.862	2.049
2	-0.666	-0.846	-1.959	2.223	-1.146	0.245	-0.791	0.717	-1.627	-0.756	-0.54	0.956	0.47	0.481	-0.476	0.514	1.563	-0.086	1.237	0.786	1.649	-0.286	0.908	0.054	1.407	-0.155	1.155	3.616	0.538	1.607	0.695	3.151	2.272	2.572	1.745	1.189	1.374	0.228	1.646	1.703	1.567	1.287	2.137	1.28	-0.198	-0.07	1.386	0.914	0.306
3	-1.32	-2.091	-2.011	-0.771	-1.181	-0.167	-0.627	-1.933	-0.944	-1.017	-1.845	-2.085	-0.898	-1.711	-1.819	-2.332	-1.204	-1.099	-0.866	-1.32	-2.229	-0.852	-0.671	-2.305	-1.769	-2.282	-0.329	0.287	-0.051	-0.697	-1.73	-1.55	-1.191	1.054	-0.357	-0.705	0.365	0.143	0.044	-0.083	2.23	-0.099	0.632	-0.06	-0.48	0.301	0.217	-0.3	-1.063
4	-1.644	-2.437	-2.37	-1.264	-2.061	-2.188	-2.806	-2.246	-0.826	-0.548	-1.826	-1.956	-1.024	-1.111	-2.293	-1.231	-0.348	-0.871	-1.833	-1.207	-1.419	-1.045	-1.207	-2.409	-0.194	-0.675	-0.228	-0.283	-0.67	-0.652	-0.686	-1.367	0.654	-0.023	0.649	-0.342	-0.711	-0.203	-1.035	-0.178	0.021	-0.153	-0.353	0.196	-0.368	-0.31	-0.138	-0.97	0.822
5	-1.52	-1.31	-1.316	-2.615	-2.121	-1.862	-1.978	-0.138	-1.156	-1.854	-1.383	-1.497	-0.775	-0.551	-1.817	0.009	-1.03	-1.801	1.034	-0.158	0.795	0.881	-0.197	-1.526	-0.258	-1.528	-1.669	-1.381	-1.882	-1.122	-0.712	-0.735	-1.268	-1.486	-1.075	-1.582	0.872	-0.043	-0.226	-0.261	0.134	0.781	1.611	-0.485	0.754	-0.225	-0.565	-1.092	0.231
7	-2.736	-0.139	-3.611	-1.748	-2.33	-1.389	-1.747	-1.365	-1.301	-0.619	-1.605	-0.895	-0.968	-0.927	0.002	0.052	-1.736	-0.947	-0.779	-1.993	-1.703	-1.336	-2.384	-1.425	-1.095	0.422	-3.215	-1.272	-1.981	-0.444	-0.72	-0.615	-0.919	0.929	-1.074	-0.043	-0.855	0.263	0.536	0.274	-1.395	0.09	-0.453	-0.919	-0.887	-0.669	-1.8	0.138	3.264
8	2.07	1.078	2.756	-0.468	1.927	1.512	2.584	1.203	1.762	0.484	-0.529	0.258	1.403	0.835	1.903	2.191	1.516	1.723	1.443	0.688	3.279	0.945	1.462	2.432	1.494	-0.044	1.201	-0.369	-0.484	0.916	2.148	0.852	1.497	0.497	0.891	0.373	0.232	-0.42	0.444	1.764	1.245	0.694	1.063	0.196	1.896	1.054	0.614	0.716	3.21
9	-1.821	-0.372	-1.726	-2.503	-0.99	-0.98	-0.395	-1.924	-0.761	-1.107	-2.483	-1.008	0.721	-0.001	0.362	-0.488	-1.003	0.432	0.294	-1.577	-2.087	-0.294	0.769	0.866	0.415	-1.27	-0.443	-1.505	-3.77	-0.04	-0.628	-1.616	0.935	-1.445	-1.493	-0.755	-0.36	-0.388	-0.627	-0.727	-0.762	1.426	-1.14	-1.571	-2.701	-0.277	-0.374	-0.097	2.335
10	-3.377	-1.467	-0.771	-1.212	-2.066	-0.97	-0.894	-1.087	-0.142	-0.417	-1.815	0.607	-1.961	-0.426	-1.076	-0.451	-0.589	-0.786	-0.131	-1.089	-0.706	-0.778	-0.08	-0.931	-2.007	-0.165	0.461	0.315	1.331	-0.885	-0.43	0.469	-0.071	0.105	-0.171	0.909	-0.923	-0.791	-1.097	0.16	0.437	-0.702	-0.151	-0.041	0.603	-0.421	0.216	0.428	0.565
11	-0.768	1.743	0.429	-0.088	-0.916	-0.233	0.721	0.579	-1.262	0.447	1.048	-1.197	1.359	0.657	-0.087	0.644	1.312	0.358	0.002	0.757	1.184	0.293	0.463	0.365	-1.383	0.054	-0.077	-1.659	-2.12	-1.012	0.081	-0.256	-3.552	-1.231	-0.551	-2.41	0.149	-0.826	-1.044	-1.302	-0.173	0.013	-0.821	-0.4	0.485	-1.349	-0.156	-1.096	6.457
12	-2.763	-1.279	-2.068	-1.459	-2.084	-1.819	-1.309	-1.397	-1.582	-1.645	-3.036	-1.453	-2.685	-2.671	-2.533	-1.457	-2.116	-3.043	-1.091	-2.134	-3.57	-0.593	-2.772	-2.26	-1.167	0.519	-1.21	-0.238	-0.277	0.173	0.23	-0.352	-1.528	-0.785	-0.829	-0.081	-1.21	0.355	0.439	0.767	-0.46	-0.44	0.123	-0.752	0.565	0.786	-0.726	-1.069	3.467
13	-1.332	-0.919	-0.773	-1.326	-0.507	-0.6	1.674	-1.052	-0.401	0.425	-0.926	-0.05	1.039	0.238	-0.19	-0.526	-0.251	1.184	0.12	0.405	-0.533	-0.272	-0.55	0.632	-2.356	-0.371	-1.174	-0.964	-0.724	-1.571	0.401	-1.313	0.279	-1.403	-1.669	-0.11	1.445	-1.022	-0.459	-1.25	-0.132	-0.042	-0.604	-1.172	0.667	-0.803	-1.266	0.41	-1.837
14	-2.084	-1.907	-1.513	0.229	-0.697	-1.658	-0.601	-2.176	-1.89	-0.511	-0.317	-3.098	-1.311	-0.277	-1.515	-0.751	-1.361	-1.258	-1.184	-3.023	-1.182	-1.327	1.485	-0.491	-1.091	-1.53	-0.911	-0.324	-0.888	-0.429	-1.307	-1.332	-1.24	-0.447	-0.083	-2.908	-0.622	-0.036	-1.809	-0.221	-1.538	-1.09	-1.917	-1.767	-1.257	-1.719	0.778	-0.58	-0.269
15	-2.117	-0.182	-1.02	-0.172	-1.824	0.046	-1.487	0.302	-1.723	-1.849	-1.036	0.001	-0.701	0.337	-1.869	-2.392	-0.818	-1.363	-0.027	-0.624	-0.2	0.164	-1.004	0.02	-3.143	-1.668	-3.914	-2.636	-4.566	-3.54	-4.092	-3.156	-4	-3.423	-3.016	-2.161	-0.382	-1.206	-2.38	-3.174	-2.461	-2.665	-1.429	-1.575	-1.914	-2.179	-1.998	-2.008	-1.857
16	-1.43	-1.214	-2.665	-2.815	-2.458	-1.364	-2.862	-2.016	-3.398	-3.254	-3.881	-0.567	-3.242	-1.1	-2.454	-2.842	-0.18	-2.091	-0.555	0.284	-1.58	-3.045	-2.792	0.089	2.126	2.145	1.439	0.449	1.983	3.588	0.439	1.062	2.658	1.07	0.18	2.86	2.026	0.535	1.691	0.352	2.345	3.294	2.703	3.739	1.888	0.922	-0.019	0.808	0.389
17	-1.368	-0.995	-2.287	-2.041	-1.244	-1.215	-3.032	-2.067	-0.926	-1.821	-1.674	-0.765	-2.078	-0.015	-1.008	-3.071	-2.342	-2.076	-0.499	-0.829	-1.182	-0.615	-1.598	-1.939	-1.792	-1.258	1.593	-2.221	-1.619	-1.442	-2.798	-1.33	-0.898	-2.312	-2.705	-1.812	-2.48	-1.853	-1.115	-2.708	-1.579	-1.819	-1.791	-1.193	-1.595	-2.29	-2.814	-1.126	2.797
19	-0.326	-1.155	-2.26	-0.812	-1.548	-1.022	-1.482	-0.414	-1.046	-1.259	-2.407	-1.459	-1.843	-0.938	-0.716	0.067	-2.273	-1.198	-0.114	-1.736	-0.909	-2.618	-0.471	-1.826	-0.075	-0.888	-1.581	0.097	-0.419	-0.419	-0.661	0.35	-1.3	-0.539	-2.653	0.03	-1.196	-0.804	-0.34	-0.325	-1.589	-0.795	-0.662	-1.38	0.366	-2.12	-0.275	-2.506	-0.672
20	-2.914	-3.606	-3.82	-3.14	-2.622	-2.928	-4.055	-2.664	-3.916	-3.382	-3.252	-2.604	-1.507	-1.063	-0.896	-1.799	-2.147	-2.556	-4.423	-1.129	-3.171	-1.698	-2.09	-2.821	-1.815	-0.954	-2.571	-1.786	-0.674	-0.702	-1.753	-1.456	-2.368	-1.357	-1.546	-3.074	-1.122	0.425	-0.141	-0.09	-0.063	-0.62	-1.367	0.611	-1.548	-0.168	-0.509	-1.414	-1.227
21	-2.654	0.527	-1.379	-0.806	-1.296	0.675	0.862	0.66	-0.054	0.102	-1.33	-0.089	1.121	1.345	1.363	-0.111	2.28	0.271	1.696	1.838	1.276	0.9	0.414	1.17	-2.142	-0.414	-0.741	-0.667	-0.758	0.422	-1.734	0.605	-0.421	0.068	-1.654	0.548	0.482	0.484	0.157	-0.732	0.163	-0.3	0.57	0.004	0.491	0.354	-0.257	1.035	0.618
22	0.443	0.408	-1.578	-0.164	0.016	0.088	0.276	-0.352	-0.204	1.187	-0.266	0.488	0.71	0.323	0.373	-0.499	-0.025	0.283	0.82	-0.636	1.006	0.549	0.384	1.278	-0.862	-0.097	-0.689	0.682	-0.659	-1.49	0.128	-0.583	-0.733	-0.301	-0.515	-1.13	0.397	0.047	0.193	-0.657	0.047	0.549	0.176	-1.207	0.835	0.979	-0.418	-0.205	3.502
23	-0.355	-0.403	-0.321	-0.264	-1.25	0.511	1.057	-0.723	0.009	0.657	0.374	-0.191	-0.725	0.11	0.424	1.047	0.051	0.037	1.325	1.042	1.262	0.886	0.084	0.662	0.193	-1.027	-2.48	-1.591	-0.979	-0.433	-0.139	-0.13	0.086	-1.865	-0.825	-2.964	-1.363	1.388	-0.53	0.482	-0.826	-0.114	-0.783	-0.253	-1.463	-1.106	1.192	-0.633	0.784
24	-1.498	1.741	1.148	-0.124	1.223	-0.024	1.443	1.709	0.056	-3.244	1.571	-1.142	0.641	-0.994	1.174	1.083	-0.408	-0.309	-0.724	0.598	0.185	2.024	1.48	-0.3	-0.862	-0.882	-1.475	-0.918	0.36	-1.841	-1.775	-1.296	0.593	-0.538	1.573	-2.79	-0.9	0.502	0.626	-0.751	-0.439	-0.178	-0.764	0.008	0.504	-1.18	0.128	-0.6	5.105
25	-2.866	-0.842	0.278	-1.712	-2.249	-0.356	-2.969	-2.182	-1.902	-1.86	-2.551	-3.85	-0.764	-1.741	-2.617	-1.501	-0.419	-0.515	-2.018	-3.254	-2.434	-1.936	-1.72	-2.689	-1.909	-0.711	-0.252	-1.332	-2.541	-0.395	-2.903	-1.069	-1.651	-1.317	-1.633	-3.247	-0.944	-1.396	-1.912	-1.688	-0.384	-0.639	-2.677	-2.176	-2.922	-2.165	0.37	-1.814	-1.051
26	0.073	-0.478	0.342	0.795	-0.88	0.345	-0.8	-1.47	-1.441	0.66	0.409	0.282	0.403	0.514	-0.624	0.727	-0.506	-0.105	-0.116	1.21	-0.414	-0.724	0.645	-0.153	0.248	0.122	-0.5	-0.416	-0.999	0.316	-0.436	-2.196	-0.914	1.392	0.686	0.209	0.178	-0.34	-1.635	0.946	-0.716	-0.265	-0.541	1.136	-1.038	-0.742	0.635	0.223	3.989
27	-0.711	-2.322	-1.741	-1.658	-1.501	-1.069	-2.843	-1.516	-2.493	-0.158	-2.328	-1.061	-1.638	-1.645	-1.653	-0.765	-0.559	-0.849	-0.82	-0.027	-0.883	-0.529	-0.631	-0.91	-1.919	-3.899	-2.08	-2.256	-2.62	-0.291	-4.429	-1.607	-3.039	-2.055	-2.652	-1.219	-2.399	-2.168	-2.265	-0.929	-0.735	-1.169	-1.945	-0.35	-1.967	-0.401	-1.572	-1.718	5.684
28	0.173	-0.313	-1.309	0.771	-0.04	1.503	1.002	0.867	-1.198	-0.371	1.103	0.473	2.213	1.434	-0.363	0.253	1.622	0.505	0.673	0.78	0.668	0.024	1.561	0.191	0.157	0.226	-0.784	0.712	-0.576	0.487	0.766	-0.734	0.292	-0.022	0.372	0.052	1.624	2.673	1.678	0.697	0.666	1.438	1.322	0.949	1.321	0.789	2.197	0.364	4.625
29	-0.091	-0.485	0.096	0.038	0.136	-0.077	0.687	0.166	0.013	0.059	-0.63	-1.216	0.411	-0.633	0.127	0.183	-0.534	-0.435	-0.947	-1.338	0.507	0.128	-0.568	-0.394	-0.046	-0.264	-0.718	0.452	0.478	-0.339	1.08	1.083	0.751	-0.124	0.204	-1.383	0.162	-0.601	0.146	0.734	-0.069	-0.355	-0.319	-0.019	0.375	-0.55	0.155	0.12	0.349
30	-4.182	-3.156	-2.755	-3.277	-3.573	-2.479	-5.81	-2.098	-1.65	-2.985	-3.01	-3.549	-1.587	0.664	-0.329	-0.895	-0.229	-1.215	-1.929	-1.311	-2.735	-0.68	-1.157	-0.743	-3.101	-2.894	-1.822	-3.349	-2.644	-1.538	-4.054	-2.447	-1.949	-2.173	-0.343	-2.734	-0.871	1.254	-0.097	-0.967	-0.085	-1.826	-1.21	0.759	-1.475	0.173	-0.049	-1.262	4.639
31	-2.511	-2.19	-2.543	-2.082	-1.775	-1.783	-3.04	-3.203	-0.914	-2.185	-2.928	-1.342	-0.906	-1.656	-2.112	-0.573	-0.88	-1.028	-1.382	-2.935	-1.002	-1.575	-1.923	-1.974	-0.909	-1.544	-1.379	-1.959	-1.174	-1.099	-1.348	-1.681	-0.307	-1.888	-2.149	-1.323	-0.892	-1.47	-1.917	-0.667	-0.563	-1.681	-0.96	-2.295	-0.497	-0.339	-1.205	-1.895	-0.6
32	-1.608	-2.339	-2.888	-1.906	-0.808	-0.344	-3.455	-1.849	-3.402	-2.224	-3.694	-0.75	-1.929	-1.141	0.265	-1.522	-1.647	-1.879	-0.701	-0.99	-0.212	-0.175	0.018	-1.469	-3.689	0.64	-1.902	-1.846	-1.297	0.892	-0.567	-1.218	-0.189	-0.652	-1.622	0.724	-0.516	1.261	1.163	-1.527	-0.754	2.159	1.462	-0.317	1.767	0.327	0.922	0.365	0.741
33	-0.883	-0.388	-1.74	-1.329	-1.124	1.376	-0.033	-1.282	0.364	-1.522	-1.224	-2.31	1.168	-0.448	-0.701	-0.08	-0.774	-0.636	-0.306	-0.656	0.607	-0.818	0.284	-1.175	-2.057	-1.59	-2.629	-1.793	-1.996	0.361	-1.926	-1.725	-1.282	-1.958	-2.117	-3.324	-0.776	-1.49	-1.638	-0.645	-2.128	-1.17	-1.794	-1.401	-1.018	-2.068	-1.34	-2.212	-3.322
[truncated: 671 more columns]
